1 **Effects of population, latitude, and individual tree to leaf variation in oaks: An empirical**  
2 **study and simulation of sampling strategies in bur oak (*Quercus macrocarpa*, Fagaceae)**

3

4 Sara C. Desmond<sup>1</sup>, Mira Garner<sup>1</sup>, Seamus Flannery<sup>1,3</sup>, Alan T. Whittemore<sup>4</sup> and Andrew L.  
5 Hipp<sup>1,5,6</sup>

6

7 <sup>1</sup> The Morton Arboretum, 4100 Illinois Route 53, Lisle, IL 60532, USA

8 <sup>2</sup> Current address:

9 <sup>3</sup> The University of Chicago Laboratory Schools, 1362 East 59<sup>th</sup> St., Chicago, IL 60637, USA

10 <sup>4</sup> U.S. National Arboretum, 3501 New York Ave NE, Washington, DC 20002, USA

11 <sup>5</sup> The Field Museum, 1400 S Lake Shore Drive, Chicago, IL 60605, USA

12 <sup>6</sup> Author for correspondence (email: [ahipp@mortonarb.org](mailto:ahipp@mortonarb.org))

13

14 **ABSTRACT**

15 PREMISE: Oaks are notoriously variable in leaf morphology, but little is known regarding the  
16 partial contributions of climate, population, latitude, and individual tree to total variation in leaf  
17 morphology. This study examines the contributions of within-tree, among-tree, and among-site  
18 variation to the total variation in leaf morphology in bur oak (*Quercus macrocarpa*), one of  
19 North America's most geographically widespread oak species.

20 METHODS: Samples were collected from four sites each at northern, central, and southern  
21 latitudes of the bur oak range. Ten leaf size traits were measured, and variance in these traits and  
22 eight ratios was partitioned into tree, population, and latitude components. We then

23 parameterized a series of leaf collections simulations using empirical covariance among leaves  
24 on trees and trees at sites.

25 KEY RESULTS: Leaf size measurements were highly responsive to latitude. Site contributed  
26 more than tree to total variation in leaf morphology. Simulations suggest that power to detect  
27 among-site variance in leaf morphology increases with either increases in leaves per tree (10-11  
28 leaves from each of 5 trees) or trees per site (5 leaves from each of 10+ trees).

29 CONCLUSIONS: Our study demonstrates the utility of both simulating sampling and controlling  
30 for variance in sampling for leaf morphology, whether the questions being addressed are  
31 ecological, evolutionary, or taxonomic. Simulation code is provided to help researchers plan  
32 sampling strategies to maximize the ability to detect among-site variance in leaf morphology.

33

34 Keywords: climate; Fagaceae; leaf morphology; latitude; *Quercus macrocarpa*; sampling  
35 simulation; variation

36

37 Running head: Leaf morphological variation in bur oak

38 Manuscript received \_\_\_\_\_; revision accepted \_\_\_\_\_.

39

## 40 INTRODUCTION

41

42 Leaf morphology and anatomy play key roles in plant adaptation to their environment  
43 (Givnish, 1987; Wright et al., 2005; Xu et al., 2009). Leaf size, shape, and anatomy differ greatly  
44 depending on the environment the plant is growing in (Bruschi et al., 2003) and the resources  
45 available in that environment (Niinemets, 2015). Yet the morphology of tree leaves can vary  
46 highly even within forest stands (Givnish, 1987). Factors such as position on the tree (Blue and  
47 Jensen, 1988), light availability (Ducrey, 1992), climate (Peppe et al., 2011), and genetic  
48 differences (Gurevitch, 1992) all contribute to variation in leaf shape and size, making sampling  
49 strategy important for understanding determinants of tree leaf morphology.

50 Oaks have long been noted for their particularly variable morphology, both among trees  
51 within individuals and among trees within sites. Detailed studies in oaks have utilized either  
52 linear measurements (e.g., Baranski, 1975; Blue and Jensen, 1988; Bruschi et al., 2003) or  
53 landmark approaches (e.g., Jensen 1990). Both approaches have demonstrated that while  
54 variation among positions within a tree in both leaf shape and size may exceed variation among  
55 sites, overall variance is generally greater among sites. These papers have highlighted that  
56 studies investigating among-population divergence patterns must hold sampling season and leaf  
57 position on the tree constant (i.e., high or low on the tree and disposed toward the edges or inside  
58 of the canopy; Sokal et al., 1986; Blue and Jensen, 1988; Bruschi et al., 2003). The advantages of  
59 understanding the sources of variance on leaf morphology are great, as such understanding  
60 enables studies to utilize leaf morphology in investigating introgression, hybridization, and  
61 morphological variation that distinguishes species (Jensen et al., 1984; Howard et al., 1997;  
62 Kremer et al., 2002; González-Rodríguez et al., 2004, González-Rodríguez and Oyama 2005).

63           The aim of the current study was to quantify the relative contributions of within-tree,  
64 among-tree, and among-site variation to the total variation in leaf morphology in bur oak. We  
65 also aimed to determine to what extent we can predict variation in leaf morphology based on  
66 latitude, and how much sampling is required to detect among-site differences in leaf  
67 morphology. Bur oak (*Quercus macrocarpa* L.) serves as an excellent model species for this  
68 study because it has exceptionally high morphological variation (Hamerlynck and Knapp, 1994;  
69 Koenig et al., 2009) and an extensive distribution, ranging from Manitoba to the Gulf of Mexico  
70 (Stein and Binon, 2003). The species also exhibits high within-population molecular genetic  
71 variation (Schnabel and Hamrick, 1990), suggesting that an investigation of the leaf  
72 morphological variation among vs within sites is appropriate as a precursor to future studies of  
73 what environmental factors contribute to morphological variation in bur oak leaves.

74

## 75 **MATERIALS AND METHODS**

76

77           *Collections and site attributes*—During the summer and fall of 2017, samples were  
78 collected from four sites each at northern, central, and southern latitudes of the bur oak range  
79 (Fig. 1). The northern sites sampled were located in Manitoba (Assiniboine Park, Whiteshell  
80 Provincial Park, and Spruce Woods Provincial Park) and Minnesota (The University of  
81 Minnesota – Twin Cities). The central sites sampled were located in Illinois (The Morton  
82 Arboretum), Indiana (Burr Oak Woods), Iowa (Cherokee Park Trail), and Minnesota (Prairie  
83 Moon Nursery). The southern sites sampled were located in Oklahoma (Tallgrass Prairie  
84 Preserve, Mohawk Park, Red Rock Canyon State Park) and Missouri (Buttin Rock Access). For  
85 each site, latitude and longitude were recorded to a precision of 5 decimal places (Table 1). We

86 extracted 19 bioclim variables from the WorldClim database (resolution = 1 km<sup>2</sup>) and linked  
87 them to our dataset in R v. 3.3.2 (R Development Core Team, 2017) using the raster (Hijmans  
88 2017) and sp (Pebesma and Bivand 2005) packages. The map of collection sites was made using  
89 the maps package (Becker et al. 2018).

90 Three bur oak trees were sampled from each site using a pole pruner at two or four  
91 meters in height, based on tree height. For each sample, a terminal branch was cut down from  
92 each of the cardinal directions (N, S, E, W), determined using a compass. Only outermost  
93 branches were sampled. Two endmost leaves were removed from each branch and immediately  
94 pressed, for a total of 8 leaves per individual, 272 leaves overall. If the endmost leaves were  
95 highly damaged, the next endmost leaves were selected. Leaves that were highly misshapen or  
96 broken were excluded from analyses. Leaves were dried in a standard herbarium drier prior to  
97 measuring, then redried at 49° C for a minimum of 48 hours and weighed on a PB303 Delta  
98 Range scale to obtain dry mass.

99  
100 ***Morphological Measurements***—Ten size measurements (mm) were made on each leaf  
101 using ImageJ (Schneider et al. 2012): blade length (bladeL), blade width (bladeW), width of  
102 blade between deepest pair of sinuses (sinusMinW), petiole length (petioleL), petiole width  
103 (petioleW), length of lamina from base to widest point (bladeLtoWidestPoint), width of blade  
104 between pair of sinuses just above the deepest pair (sinusNextW), total length (BL.PL), leaf base  
105 angle (bladeBaseAngle), and leaf area (Area) (Table 2, Fig. 2). Seven ratios were also calculated  
106 from these measurements to distinguish leaf shape from leaf size (González-Rodríguez and  
107 Oyama 2005): petioleL / BL.PL (PL.TL); sinusMinL / sinusNextL (SinusRatio); bladeL /  
108 bladeW (BL.BW); petioleL / petioleW (PL.PW); BL.BW / PL.PW (BL.BW.over.PL.PW);

109 bladeL / bladeLtoWidestPoint (BL.BLWP); lobedness, calculated as blade width between the  
110 deepest sinuses divided by total blade width, abbreviated (sinus.v.width); and specific leaf area  
111 (SLA), calculated as leaf blade area / leaf blade mass (Table 2). A panel of significant  
112 regressions was created using the packages grid (R Development Core Team, 2017) and  
113 gridExtra (Auguie, 2017). Leaf shape was further investigated using Fourier analysis (Crampton,  
114 1995), discussed in analysis methods below.

115  
116 *Statistical Analysis—Linear Regressions and ANOVA*—All statistical analyses were  
117 conducted in R version 3.3.2 (R Development Core Team, 2017). 17 simple regressions were  
118 performed on all leaf traits using the lm function to assess which leaf traits were most responsive  
119 to latitude at the site level, aggregating leaf traits first to tree, then to site. Data were visualized  
120 using ggplot2 (Wickham, 2009). In addition to simple regressions, we corrected for size by  
121 conducting multiple regressions for all of our leaf traits using the lm function and including  
122 blade length (bladeL) as a covariate. We used data scaled to a mean of zero and unit variance.

123 We performed a principal component analysis (PCA<sub>MORPH</sub>) on all scalar measurements  
124 and ratios using the prcomp function. The point MN-MG788 was removed prior to analysis  
125 because it significantly skewed the ordination graph. Two-dimensional nonmetric  
126 multidimensional scaling on a Euclidean distance matrix based on principal component axes was  
127 used to visualize the data. The scaling type was ‘centering’ with PC rotation. We used the  
128 ordiellipse function in the package vegan (Oksanen et al., 2017) to plot bounding ellipses on our  
129 ordination.

130 Two-way ANOVA was used to assess the relative contributions of site and tree to the  
131 total variation in bladeL, SLA, PC1<sub>MORPH</sub> and PC2<sub>MORPH</sub>. Principal components one and two

132 were extracted from the principal component analysis mentioned above and attached to our  
133 original dataset. ANOVA was conducted on the linear model of bladeL, SLA, PC1<sub>MORPH</sub>, and  
134 PC2<sub>MORPH</sub> regressed against site and tree. We chose PC1<sub>MORPH</sub> and PC2<sub>MORPH</sub> for this analysis  
135 because together they accounted for 52.5% of the variance.

136 We complemented analyses based on linear measurements with Fourier analysis, which  
137 generates shape-representative variables that are independent of size (Crampton, 1995), using the  
138 elliptical Fourier analysis (EFA) method in the R package Momocs (Bonhomme et al., 2014).  
139 We chose EFA because elliptical Fourier functions precisely and efficiently capture outline  
140 measurements and can be applied to more complex shapes than polar Fourier functions (Tracey  
141 et al., 2006). First, black and white silhouettes of each leaf image were created using ImageJ and  
142 converted into jpeg files. Petioles were manually removed from all leaf images because ImageJ  
143 did not remove them at a consistent location (some were broken in the middle, for example). The  
144 jpeg files were then imported into R and converted into an Out object. We initially found that  
145 EFA sometimes connected leaf outlines incorrectly, especially through the creation of "figure 8"  
146 outlines, when points on one edge of the leaf incorrectly linked to points on the opposite edge.  
147 To correct this, we normalized the outlines using four landmarks placed on the top, bottom, left,  
148 and right of each outline. EFA was then performed again on the outlines using 17 harmonics (the  
149 default setting), which yielded outlines that more closely resembled the actual leaves. PCA was  
150 then performed on the EFA. A first analysis was completed including all leaf images; then a  
151 second analysis was completed after eliminating the leaf silhouettes that were highly misshapen.  
152 Principal component axes were extracted and simple regressions were performed to examine the  
153 response of PC1<sub>EFA</sub> and PC2<sub>EFA</sub> to latitude.

154

155           *Simulations of sampling strategies*—We assessed the effectiveness of alternative  
156 sampling scenarios to distinguish differences among populations by using our estimates of  
157 variation to generate simulated morphological datasets for 20 populations that ranged from three  
158 to 12 trees per site and three to 12 leaves per tree, a total of 100 sampling strategies. For each  
159 strategy, we simulated 100 replicate datasets of all ten direct morphological measurements using  
160 a hierarchical simulation strategy, using the data we collected to parameterize the simulation. For  
161 each replicate, site-level means for all 10 traits were drawn from the multivariate normal  
162 distribution with trait means and covariance  $\mathbf{C}_{\text{site}}$  estimated from observed site means for all  
163 traits;  $\mathbf{C}_{\text{site}}$  is thus based on variance within and covariance among traits that we observed,  
164 averaged for each site. Tree-level means were then drawn from the multivariate normal  
165 distribution with the simulated site-level means and the covariance matrix  $\mathbf{C}_{\text{tree}}$  estimated from  
166 tree means at each site and averaged across sites: tree-level means were thus assumed to have a  
167 constant variance and covariance among sites. Finally, individual leaf measurements for each  
168 tree were drawn from the multivariate normal distribution with means from the second  
169 simulation stage and covariance matrix  $\mathbf{C}_{\text{leaf}}$  estimated from the leaf measurements for each tree  
170 separately, then averaged across trees.

171           The resulting 100,000 data matrices ranged from 180 to 2,880 simulated leaves, with trait  
172 covariance and variance among leaves within trees, among trees within populations, and among  
173 populations modeled according the measurements we made for this project. Because leaf size  
174 showed particularly strong variation among populations, we utilized ANOVA of bladeL on site +  
175 tree, combined with Tukey’s Honest Significant Different (HSD) method to assess the number of  
176 populations that could be differentiated from one another in each simulated data matrix. The  
177 number of letters needed for a compact letter display using Tukey’s HSD at  $\alpha = 0.05$  was used as



178 a proxy for the number of groups that could be distinguished for each simulated dataset. Both the  
179 average number of groups distinguished for each simulated dataset and the percent of  
180 simulations that distinguish at least 50% of populations (10 / 20) are reported as estimates of  
181 statistical power. All simulations were conducted in R using the mvtnorm package (Genz et al.  
182 2017), and code for performing simulations is posted online ([https://github.com/andrew-](https://github.com/andrew-hipp/oak-morph-2020)  
183 [hipp/oak-morph-2020](https://github.com/andrew-hipp/oak-morph-2020)). All code posted is readily adapted to any simulation study with  
184 multivariate traits collected in a similarly structured design (measurements nested within  
185 individuals nested within sites).

186

## 187 **RESULTS**

188 *Morphological measurements*—Among the size characters, bladeL, bladeW, BL.PL,  
189 petioleW, and Area all showed significant variation in response to latitude (Table 3, Fig. 3). To  
190 our surprise, petiole width was the size trait that was the most significant ( $P < .001$ ). Petiole  
191 length, sinusMinL, sinusNextL, and blade base angle were not significantly different among  
192 latitudes (Table 3). On average, leaves were 155.32 mm long, 102.69 mm wide, and had an area  
193 of 8629.3 mm<sup>2</sup>. The ratios that were significantly correlated with latitude were SLA and the ratio  
194 of sinus depth to leaf width (sinus.v.width) (Table 3). After running the regressions a second  
195 time using bladeL as a covariate, we found that sinusNextL ( $P = 0.021$ ), petioleW ( $P = 0.017$ ),  
196 bladeL ( $P = 0.012$ ) and SLA ( $P = 0.011$ ) were the only traits significantly affected by latitude  
197 alone (Table 3). Graphical representation for the six most significant regressions is shown in  
198 figure 3.

199

200            *Analysis of empirical data*—The effect of site and tree on bladeL, SLA, PC1, and PC2  
201 was significant based on ANOVA ( $P \ll 0.001$ ; Table 4). Although site and tree both had  
202 significant effects, site contributed more than tree to the total variation in leaf morphology (F-  
203 values for site range from 30.38–41.76, while F-values for tree range from 5.83–12.4). Mean  
204 annual temperature among our sites ranged from 2.1–15.3°C, and mean annual precipitation  
205 from 460 – 1121 mm. On average, leaf bladeL averaged 34.0 mm shorter and SLA 50.39 mm<sup>2</sup>/g  
206 greater for each increase 10 degrees in latitude (northward). When we extracted PC1<sub>EFA</sub> and  
207 PC2<sub>EFA</sub> from the EFA to perform simple regressions against latitude, both were non-significant  
208 ( $P = 0.74$  and  $P = 0.29$ ). After performing a principal component analysis on our dataset, we  
209 found that together PC1<sub>MORPH</sub> and PC2<sub>MORPH</sub> explained 52.5% of the variance among leaves. As  
210 shown in the ordination (Fig. 4), leaves collected from sites at northern latitudes tend to cluster  
211 more tightly than leaves collected from southern sites, which tend to be more spread out. The  
212 EFA PCA (Supplemental Figure S1) principal components PC1<sub>EFA</sub> and PC2<sub>EFA</sub> explained only  
213 30.5% of the variance in leaf shape and are nonsignificant. They are not discussed further in this  
214 paper.

215            Regressions of leaf morphology on climate closely matched the results of morphology  
216 regressions on latitude. The latitudinal gradient in our study correlated tightly with climate:  
217 increasing in latitude entails decreases in mean annual precipitation (Bio12;  $R^2 = 0.6803$ ,  $p <$   
218  $0.01$ ) and temperature (Bio1;  $r^2 = 0.99$ ,  $p \ll 0.01$ ), and an increase in temperature seasonality  
219 (Bio4;  $R^2 = 0.97$ ,  $p \ll 0.01$ ) (Fig. 5). As a consequence, climate is not considered further in this  
220 study, but only latitude.

221

222            *Analysis of simulated data*—The mean number of groups distinguished in our  
223 simulations ranged from 5.49 to 10.41, and the probability of distinguishing 50% (10 / 20) of the  
224 populations ranged from 0.01 to 0.71 (Fig. 6). The sampling strategy we implemented for this  
225 study, 3 trees per site, 8 leaves per tree, had a power of only 38%. Increasing power to at least  
226 50% would entail increasing sampling to 11–12 leaves from each of 5 trees, 5 leaves from each  
227 of 10–11 trees, or any of a number of scenarios intermediate between these extremes.

228

## 229 **DISCUSSION**

230            Our study demonstrates that among-tree and among-site variation contribute significantly  
231 to total variation in leaf morphology in bur oaks, and that both within-individual and within-  
232 population sampling are important components of a sampling strategy aimed at characterizing  
233 among-population variation in oak morphology. Our results give us insight into how variation is  
234 distributed across different levels (within trees, among trees within populations, and among  
235 populations) and provide insight into how to improve sampling methods in the future. Our  
236 analyses demonstrate that among-site variation contributes most strongly to total leaf variation,  
237 and we detected significant effects of latitude on both leaf size and specific leaf area, consistent  
238 with expectations. Using simulation, we demonstrated that our sampling strategy, which included  
239 8 leaves from different positions on each of 3 trees per site, was not optimal for resolving  
240 among-site variation, even if it was sufficient to demonstrate the relationship between  
241 morphology and latitudinal gradients. We provide guidance for future sampling as well as a  
242 framework and code to conduct power analyses on morphological datasets composed of similarly  
243 hierarchical samples, where sites are composed of multiple individuals and individuals are each  
244 represented by multiple measurements.

245

246 *How are leaf traits correlated with latitude and climate?*—Leaves that were collected at

247 southern latitudes averaged greater length, width, and area than leaves collected at northern

248 latitudes. Precipitation and temperature in our study increase from north to south. As water

249 availability regulates leaf growth and survival (Quero et al., 2006), and warm temperatures

250 increase transpiration rates (Nicotra et al., 2011) and photosynthetic efficiency (Peppe et al.,

251 2011), the size gradient we observe likely represents a combination of adaptive plasticity and

252 genetic variation, though that inference is beyond the scope of the current study. Our results

253 nonetheless parallel previous work in *Quercus ilex* (Garcia-Nogales et al., 2016), which

254 exhibited a similar leaf size gradient from north to south in the western Mediterranean basin.

255 Similar to our study, southern regions in the western Mediterranean basin were warmer and had

256 higher amounts of precipitation than northern regions. Our results also demonstrate that leaf size

257 and shape correlate with temperature and moisture at local and global scales (Peppe et al., 2011).

258 We had predicted that latitudinal differences in water availability would also affect leaf

259 lobing, because lobing influences how efficiently a leaf distributes heat (McDonald et al., 2003).

260 Leaves that are deeply lobed may be better adapted to warmer climates, because deeply lobed

261 and narrow leaves have a thinner leaf boundary layer, facilitating more rapid cooling (Givnish,

262 1987, McDonald et al. 2003). The ratio of sinus depth to leaf width (sinus.v.width) shows a weak

263 negative correlation with latitude ( $b = 0.013$ ,  $P = 0.024$ ), but this result is strongly affected by

264 one site, Red Rock Canyon, which had an exceptionally low value. When this outlier is

265 removed, the correlation is no longer significant ( $b = 0.007$ ,  $P = 0.054$ ). Similarly, the results of

266 our EFA were not significant (total variance = 30.5%;  $P_{PC1} = 0.74$  and  $P_{PC2} = 0.29$ ), and we

267 believe this is also due to our sample size. In multiple regressions with scaled data and bladeL as

268 a covariate, thus explicitly holding size fixed, we found that depth of the sinus immediately  
269 above the deepest sinus (sinusNextL), was significantly influenced by latitude ( $b = 0.893$ ,  $P =$   
270  $0.021$ ), even with the outlier removed ( $b = 0.926$ ,  $P = 0.023$ ). With leaf length as a covariate,  
271 latitude also has a significant effect on specific leaf area (SLA;  $b = 0.987$ ,  $P = 0.011$ ). Leaves  
272 that are low in SLA have higher water use efficiency (Mooney and Dunn, 1970), corresponding  
273 with our observation that leaves at southern sites, where trees are exposed to warmer  
274 temperatures and were likely more water-stressed, had significantly lower SLA than leaves  
275 collected at northern sites.

276 Our results show that among-site variance for all traits investigated ( $F_{11,236} = 30.38$ –  
277  $41.76$ ) contributes more to total variance in leaf morphology than among-tree variance ( $F_{11,236} =$   
278  $5.83$ – $12.42$ ), though both variance components are significant ( $P \ll 0.001$ ; Table 4). This ability  
279 to distinguish among sites is a key step in relating leaf variation to latitude or climatic predictors,  
280 and measuring the slope of the relationship resulting from selective pressures along climatic  
281 gradients (Wright et al., 2005). The measurements for each of our leaves were well predicted by  
282 their latitude of origin: leaves were thicker, larger, and had deeper lobes at southern latitudes,  
283 where leaves are exposed to warmer temperatures and higher precipitation, and have longer  
284 growing seasons; and leaves were smaller, thinner, and had shallower lobes at northern latitudes,  
285 where cold temperatures reduce water stress. Moreover, our results demonstrate that sampling  
286 three trees per site, and eight leaves per tree is sufficient to distinguish random variation from  
287 responsive variation. However, increasing sampling would increase our power to do this.  
288 Overall, these results can be used in future studies to design a sampling method that will allow  
289 researchers to detect significant, responsive variation in leaf morphology in bur oak.

290

291           *How best to sample?*—While we were able to detect among-site variation in leaf size and  
292 SLA, we had minimal success detecting among-site variation in leaf shape. The simulations we  
293 conducted of alternative sampling strategies suggests the strategy we selected of three trees per  
294 site and eight leaves per tree has only a 38% probability of distinguishing 50% of 20 populations  
295 drawn at random from distributions we observed. It may well be that our difficulty relating shape  
296 to morphology is due to a lack of sampling within sites and trees. Based on the variance observed  
297 in leaf length alone, achieving a 50% probability of distinguishing 50% of populations would  
298 require 11–12 leaves from each of 5 trees per site, 5–6 leaves from each of 11–12 trees per site,  
299 or something in between (Fig. 5). While among-site variance is higher than among-tree variance  
300 within sites (Table 4 and discussion above), the variance we observe among leaves within a  
301 single tree is still quite high. A previous study (Bruschi et al. 2003) found that among-leaf  
302 morphological variance on a tree is higher than among-tree variance for most traits investigated,  
303 and that this was in accord with findings from earlier work (Baranski, 1975; Blue and Jenson,  
304 1988). However, in Bruschi (2003), leaves were sampled from both inner and outer positions on  
305 the branch to maximize variance. In our study, we deliberately minimized this source of variance  
306 by sampling leaves at a relatively constant height and all from the outer branch position, and we  
307 further selected the endmost leaves from each branch sampled.

308           Variance among leaves on each tree was nonetheless high in our study. Thus, despite this  
309 effort to minimize the within-tree variance component—a practice we recommend—we found  
310 that additional sampling of leaves within individuals might have given us greater power to  
311 distinguish among populations (Fig. 5) by reducing the overall within-site variance relative to  
312 among-site variance. Based on the empirical and simulation work presented here, we make two  
313 recommendations to researchers conducting a study of among-site morphological variation in

314 oaks, forest trees, or in fact any type of plant. First, **control within-individual variance** by  
315 sampling leaves from comparable positions within the trees. The variation in leaf shape and size  
316 on a single oak tree can be daunting. While a wide sampling of leaves from each tree is needed to  
317 accurately characterize the mean and variance of the leaves, minimize the variance where  
318 possible by selecting leaves of a common age / developmental stage, in the same position on the  
319 twig, from twigs with comparable positions on the plants.

320         Second, **simulate alternative sampling strategies to maximize your ability to**  
321 **distinguish among populations.** Your time and resources will be limited. Should you expend it  
322 gathering more plants per site? More leaves per plant? More sites? Use your preliminary data to  
323 simulate alternative sampling strategies and estimate what your power will be to distinguish  
324 populations under different scenarios. The tools we developed for this study require only a  
325 matrix of traits and assignment of those traits to populations and individuals to perform the  
326 simulations we describe above (<https://github.com/andrew-hipp/oak-morph-2020>). We expect  
327 that their use will facilitate planning of sampling designs for similar projects.

328

## 329 **ACKNOWLEDGMENTS**

330         This study was funded by The Morton Arboretum Center for Tree Science and USDA  
331 Project 8020-21000-070-03S, a non-assistance cooperative agreement between U.S. National  
332 Arboretum and The Morton Arboretum. We would like to thank Marlene Hahn for assisting with  
333 curation of herbarium and leaf samples, Matthew Kaproth for advice on measurement of SLA,  
334 and Ricardo Kriebel for advice on morphometric analysis.

335

## 336 **AUTHOR CONTRIBUTIONS**

337 A.L.H., A.T.W. and S.C.D. conceptualized and designed the project. S.C.D., M.G., and  
338 S.F. collected specimens and data. S.C.D. conducted data analyses, and wrote the first draft of  
339 the manuscript. A.L.H. coded and analyzed simulations and contributed to data analysis. All  
340 authors contributed to writing and revisions.

341

## 342 **DATA ACCESSIBILITY**

343 Data used to conduct the statistical analysis and additional figures are available in the  
344 online Supplement.

345

## 346 **LITERATURE CITED**

- 347 Auguie, B. 2017. gridExtra: Miscellaneous Functions for "Grid" Graphics. R package version  
348 2.3. <https://CRAN.R-project.org/package=gridExtra>
- 349 Baranski, M. J. 1975. An analysis of variation within white oak (*Quercus alba* L.). *Bulletin No.*  
350 *236*, North Carolina Agricultural Experiment Station, Raleigh.
- 351 Becker, R. A., A. R. Wilks, R. Brownrigg, T. P. Minka, and A. Deckmyn. 2018. maps: Draw  
352 Geographical Maps. R package version 3.3.0. <https://CRAN.R-project.org/package=maps>
- 353 Blue, M. P., and R. J. Jensen. 1988. Positional and seasonal variation in oak (*Quercus*, Fagaceae)  
354 leaf morphology. *American Journal of Botany* 75: 939–947.
- 355 Bonhomme, V., S. Picq, C. Gaucherel, and J. Claude. 2014. Momocs: Outline Analysis Using R.  
356 *Journal of Statistical Software* 56: 1–24. URL <http://www.jstatsoft.org/v56/i13/>.
- 357 Bruschi, P., P. Grossoni, and F. Bussotti. 2003. Within- and among-tree variation in leaf  
358 morphology of *Quercus petraea* (Matt.) Liebl. natural populations. *Trees* 17: 164–172.



- 359 Crampton, J. S. 1995. Elliptic Fourier shape analysis of fossil bivalves: some practical  
360 considerations. *Lethaia* 28: 179–186.
- 361 Ducrey, M. 1992. Variation in leaf morphology and branching pattern of some tropical rain  
362 forest species from Guadeloupe (French West Indies) under semi-controlled light  
363 conditions. *Annales des Sciences Forestières* 49: 553–570.
- 364 García-Nogales, A., J. C. Linares, R. G. Laureano, J. I. Seco, and J. Merino. 2016. Range-wide  
365 variation in life-history phenotypes: spatiotemporal plasticity across the latitudinal  
366 gradient of the evergreen oak *Quercus ilex*. *Journal of Biogeography* 43: 2366–2379.
- 367 Genz, A., F. Bretz, T. Miwa, X. Mi, F. Leisch, F. Scheipl, and T. Hothorn. 2017. mvtnorm:  
368 Multivariate Normal and t Distributions. R package version 1.0-6. URL [http://CRAN.R-](http://CRAN.R-project.org/package=mvtnorm)  
369 [project.org/package=mvtnorm](http://CRAN.R-project.org/package=mvtnorm)
- 370 Givnish, T. J. 1987. Comparative studies of leaf form: assessing the relative roles of selective  
371 pressures and phylogenetic constraints. *New Phytologist* 106: 131–160.
- 372 Gurevitch, J. 1992. Sources of variation in leaf shape among two populations of *Achillea*  
373 *lanulosa*. *Genetics* 130: 385–394.
- 374 González-Rodríguez, A., D. M. Arias, S. Valencia-A., and K. Oyama. 2004. Morphological and  
375 RAPD analysis of hybridization between *Quercus affinis* and *Q. laurina* (Fagaceae), two  
376 Mexican red oaks. *American Journal of Botany* 91: 401–409.
- 377 González-Rodríguez, A., and K. Oyama. 2005. Leaf morphometric variation in *Quercus affinis*  
378 and *Q. laurina* (Fagaceae), two hybridizing Mexican red oaks. *Botanical Journal of the*  
379 *Linnean Society* 147: 427–435.

- 380 Hamerlynck, E. P., and A. K. Knapp. 1994. Leaf-level responses to light and temperature in two  
381 co-occurring *Quercus* (Fagaceae) species: implications for tree distribution patterns.  
382 *Forest Ecology and Management* 68: 149–159.
- 383 Hijmans, R.J. 2017. raster: Geographic Data Analysis and Modeling. R package version 2.6-7.  
384 <https://CRAN.R-project.org/package=raster>
- 385 Howard, D., R. Preszler, J. Williams, S. Fenchel, and W. Boecklen. 1997. How discrete are oak  
386 species? Insights from a hybrid zone between *Quercus grisea* and *Quercus gambelii*.  
387 *Evolution* 51: 747–755.
- 388 Jensen, R. J., R. Depiero, and B.K. Smith. 1984. Vegetative characters, population variation, and  
389 the hybrid origin of *Quercus ellipsoidalis*. *American Midland Naturalist* 111: 364–370.
- 390 Jensen, R. J. 1990. Detecting shape variation in oak leaf morphology: a comparison of  
391 rotational-fit methods. *American Journal of Botany* 77: 1279–1293
- 392 Koenig, W. D., J. M. H. Knops, J. L. Dickinson, and B. Zuckerberg. 2009. Latitudinal decrease  
393 in acorn size in bur oak (*Quercus macrocarpa*) is due to environmental constraints, not  
394 avian dispersal. *Botany* 87: 349–356.
- 395 Kremer, A., J. Dupouey, J. Deans, J. Cottrell, U. Csaikl, R. Finkeldey, S. Espinel, et al. 2002.  
396 Leaf morphological differentiation between *Quercus robur* and *Quercus petraea* is stable  
397 across western European mixed oak stands. *Annals of Forest Science* 59: 777–787.
- 398 McDonald, P. G., C. R. Fonseca, J. M. C. C. Overton, and M. Westoby. 2003. Leaf-size  
399 divergence along rainfall and soil-nutrient gradients: is the method of size reduction  
400 common among clades? *Functional Ecology* 17: 50–57.
- 401 Mooney, H. A., and E. L. Dunn. 1970. Convergent evolution of Mediterranean-climate evergreen  
402 sclerophyll shrubs. *Evolution* 24: 292–303.

- 403 Nicotra, A. B., A. Leigh, C. K. Boyce, C. S. Jones, K. J. Niklas, D. L. Royer, and H. Tsukaya.  
404 2011. The evolution and functional significance of leaf shape in the  
405 angiosperms. *Functional Plant Biology* 38: 535–552.
- 406 Niinemets, Ü. 2015. Is there a species spectrum within the world-wide leaf economics spectrum?  
407 Major variations in leaf functional traits in the Mediterranean sclerophyll *Quercus ilex*.  
408 *New Phytologist* 205: 79–96.
- 409 Oksanen, J., F. G. Blanchet, M. Friendly, R. Kindt, P. Legendre, D. McGlenn, P. R. Minchin, et  
410 al. 2017. vegan: Community Ecology Package. R package version 2.4-5.  
411 <https://CRAN.R-project.org/package=vegan>
- 412 Pebesma, E. J., and R. S. Bivand, 2005. Classes and methods for spatial data in R. *R News* 5:  
413 9–13. <https://cran.r-project.org/doc/Rnews/>.
- 414 Peppe, D. J., D. L. Royer, B. Cariglino, S. Y. Oliver, S. Newman, E. Leight, G. Enikolopov, et  
415 al. 2011. Sensitivity of leaf size and shape to climate: global patterns and paleoclimatic  
416 applications. *New Phytologist* 190: 724–739.
- 417 Quero, J. L., R. Villar, T. Marañón, and R. Zamora. 2006. Interactions of drought and shade  
418 effects on seedlings of four *Quercus* species: physiological and structural leaf responses.  
419 *New Phytologist* 170: 819–834.
- 420 R Development Core Team. 2017. R: A language and environment for statistical computing. R  
421 Foundation for Statistical Computing, Vienna, Austria. URL <https://www.R-project.org/>
- 422 Schnabel, A., and J. L. Hamrick. 1990. Comparative Analysis of Population Genetic Structure in  
423 *Quercus macrocarpa* and *Q. gambelii* (Fagaceae). *Systematic Botany* 15: 240–251.

- 424 Schneider, C. A., W. S. Rasband, and K. W. Eliceiri. 2012. NIH Image to ImageJ: 25 years of  
425 image analysis. *Nature Methods* 9: 671–675.
- 426 Sokal, R. R., T. J. Crovello, and R. S. Unnasch. 1986. Geographic Variation of Vegetative  
427 Characters of *Populus deltoides*. *Systematic Botany* 11: 419–432.
- 428 Stein, J. D., D. Binion, and R. E. Acciavatti. 2003. Field guide to native oak species of eastern  
429 North America. USDA Forest Service, Forest Health Technology Enterprise Team,  
430 Publication FHTET-2003-01, Morgantown.
- 431 Tracey, S. R., J. M. Lyle, and G. Duhamel. 2006. Application of elliptical Fourier analysis of  
432 otolith form as a tool for stock identification. *Fisheries Research*, 77: 138–147.
- 433 Wickham H. 2009. ggplot2: Elegant Graphics for Data Analysis. Springer-Verlag, New York.
- 434 Wright, I. J., R. P. Reich, J. H. Cornelissen, D. S. Falster, P. K. Groom, K. Hikosaka, W. Lee, et  
435 al. 2005. Modulation of leaf economic traits and trait relationships by climate. *Global*  
436 *Ecology and Biogeography* 14: 411–421.
- 437 Xu, F., W. Guo, W. Xu, Y. Wei, and R. Wang. 2009. Leaf morphology correlates with water and  
438 light availability: what consequences for simple and compound leaves? *Progress in*  
439 *Natural Science* 19: 1789–1798.
- 440

441 **Table 1. Sampling localities, Bioclim values for each site, number of leaves collected per**  
 442 **tree.** Only leaves used for statistical analysis are counted. Broken or incomplete leaves were  
 443 eliminated from statistical analysis. Abbreviations: Bio1 = mean annual temperature (in degrees  
 444 C); Bio12 = mean annual precipitation (in mm).

| <u>Site</u>                    | <u>Bio1, Bio12</u> | <u>Tree</u> | <u>Latitude</u> | <u>Longitude</u> | <u>Lvs</u> |
|--------------------------------|--------------------|-------------|-----------------|------------------|------------|
| Whiteshell Provincial Park     | 2.07°C, 566 mm     | MB-SD004    | 49.4249         | -95.1436         | 8          |
|                                |                    | MB-SD005    | 49.71279        | -95.2444         | 8          |
|                                |                    | MB-MG513    | 49.71209        | -95.24496        | 8          |
| Spruce Woods Provincial Park   | 2.50°C, 460 mm     | MB-MG516    | 49.76104        | -99.15971        | 8          |
|                                |                    | MB-MG517    | 49.76095        | -99.15983        | 8          |
|                                |                    | MB-MG518    | 49.76061        | -99.15928        | 8          |
| Assiniboine Forest             | 2.10°C, 519 mm     | MB-MG528    | 49.85778        | -97.24848        | 8          |
|                                |                    | MB-MG529    | 49.85423        | -97.2482         | 8          |
|                                |                    | MB-MG530    | 49.85392        | -97.24828        | 8          |
| University of Minnesota Campus | 7.10°C, 738 mm     | MN-MG788    | 44.97882        | -93.23768        | 8          |
|                                |                    | MN-MG789    | 44.97739        | -93.23761        | 8          |
|                                |                    | MN-MG790    | 44.97771        | -93.23801        | 7          |
| Cherokee Park Trail            | 9.20°C, 879 mm     | IA-MG243    | 41.97454        | -91.72161        | 8          |
|                                |                    | IA-MG244    | 41.97367        | -91.72547        | 8          |
|                                |                    | IA-MG245    | 41.97362        | -91.72565        | 6          |
| Morton Arboretum               | 9.50°C, 932 mm     | IL-SF001    | 41.81696        | -88.0808         | 8          |
|                                |                    | IL-SF002    | 41.81331        | -88.08266        | 8          |
|                                |                    | IL-SF003    | 41.81588        | -88.07994        | 8          |
| Prairie Moon Nursery           | 6.80°C, 837 mm     | MN-SD001    | 43.89117        | -91.64684        | 8          |
|                                |                    | MN-SD002    | 43.89804        | -91.648          | 8          |
|                                |                    | MN-SD003    | 43.89088        | -91.64689        | 2          |
| Burr Oak Woods                 | 9.80°C, 943 mm     | IN-MG631    | 41.53273        | -87.2948         | 8          |
|                                |                    | IN-MG636    | 41.5345         | -87.29279        | 8          |
|                                |                    | IN-MG638    | 41.53253        | -87.29661        | 8          |
| Red Rock Canyon State Park     | 15.3°C, 756 mm     | OK-MG369    | 35.43874        | -98.35495        | 8          |
|                                |                    | OK-MG370    | 35.43851        | -98.35503        | 8          |
|                                |                    | OK-MG371    | 35.43854        | -98.35497        | 8          |
| Mohawk Park                    | 15.3°C, 987        | OK-MG347    | 36.21066        | -95.89467        | 8          |

|                            |                 |          |          |           |   |
|----------------------------|-----------------|----------|----------|-----------|---|
|                            | mm              | OK-MG349 | 36.2204  | -95.89845 | 8 |
|                            |                 | OK-MG350 | 36.22064 | -95.89877 | 8 |
| Tallgrass Prairie Preserve | 14.3°C, 939 mm  | OK-MG282 | 36.84504 | -96.42526 | 8 |
|                            |                 | OK-MG283 | 36.84485 | -96.42479 | 2 |
|                            |                 | OK-MG284 | 36.84501 | -96.42553 | 3 |
| Buttin Rock Access         | 13.1°C, 1121 mm | MO-MG402 | 37.15687 | -91.36471 | 8 |
|                            |                 | MO-MG403 | 37.15686 | -91.36501 | 8 |
|                            |                 | MO-MG404 | 37.15726 | -91.36518 | 8 |

445

446 **Table 2. Descriptions of the leaf traits measured**

---

| <u>Leaf measurements</u>                                        |                     |                                                                                                                                                                                                                                                                               |
|-----------------------------------------------------------------|---------------------|-------------------------------------------------------------------------------------------------------------------------------------------------------------------------------------------------------------------------------------------------------------------------------|
| Trait                                                           | Abbreviation        | Definition                                                                                                                                                                                                                                                                    |
| Blade length (mm)                                               | bladeL              | Straight line distance measured from intersection of leaf and petiole to tip of the leaf at its point of intersection with the midvein                                                                                                                                        |
| Blade width (mm)                                                | bladeW              | The longest possible perpendicular line drawn from one edge of the blade to the other; vein position used to identify the leaves opposite one another                                                                                                                         |
| Width of blade between deepest pair of sinuses (mm)             | sinusMinL           | The shortest distance that separates the deepest sinus from its corresponding sinus. (The deepest sinus is defined as the sinus that has the longest distance from the most interior point of the sinus to the line that connects the two most exterior points of that sinus) |
| Width of blade between sinuses just above the deepest pair (mm) | sinusNextL          | The width between the sinuses that are immediately distal to the deepest sinuses (as defined in sinusMinL)                                                                                                                                                                    |
| Petiole length (mm)                                             | petioleL            | Measured from the base of the blade as defined by bladeL to the base of the petiole, defined as the line of intersection between petiole and branch, upper surface of the petiole                                                                                             |
| Petiole width (mm)                                              | petioleW            | Measured at the point of intersection between the blade and the petiole, where blade is not visible                                                                                                                                                                           |
| Length of lamina from base to widest point (mm)                 | bladeLtoWidestPoint | Measured from the base of the blade to the point of intersection between the midvein and the line used to measure leaf blade width                                                                                                                                            |
| Blade base angle (degrees)                                      | bladeBaseAngle      | Measured using the lines that define the widest angle between the base and either edge of the leaf                                                                                                                                                                            |
| Total length (mm)                                               | BL.PL               | Total length is the blade length added to the petiole length                                                                                                                                                                                                                  |
| Leaf area (mm <sup>2</sup> )                                    | Area                | Calculated in imageJ.                                                                                                                                                                                                                                                         |

---

---

**Ratios**

|                                             |                  |                                                                                                                                                      |
|---------------------------------------------|------------------|------------------------------------------------------------------------------------------------------------------------------------------------------|
| Petiole length / Total length               | PL.TL            | The petiole length divided by the total length                                                                                                       |
| Sinus ratio                                 | SinusRatio       | The width of the blade between the deepest pair of sinuses divided by the width of the blade between the pair of sinuses just above the deepest pair |
| Blade length/ Blade width                   | BL.BW            | The blade length divided by the blade width                                                                                                          |
| Petiole length / Petiole width              | PL.PW            | The petiole length divided by the petiole width                                                                                                      |
| Blade length / Blade length to widest point | BL.BLWP          | The blade length divided by the length of the blade from the base to the widest point                                                                |
| Ratio of Leaf size to petiole length        | BL.BW.over.PL.PW | The blade length divided by the blade width divided by the petiole length divided by the petiole width                                               |
| Specific leaf area                          | SLA              | Leaf area divided by the mass of the leaf                                                                                                            |
| Lobedness                                   | sinus.v.width    | The width of the blade between the deepest pair of sinuses divided by the blade width                                                                |

---

447

448

449



450 **Table 3. Simple and multiple regressions for all leaf traits.** The columns for Blade length and  
 451 Latitude represent the regression coefficient and p-value for a multiple regression with each leaf  
 452 trait regressed against Blade length and Latitude. Note that after Bonferroni correction for  
 453 multiple tests, only the regression of blade length on latitude + petiole width is significant; and  
 454 for that multiple regression, only the coefficient for latitude is significant

| Leaf trait                      | p-value   | $r^2$         | Blade length      | Latitude          | $R^2$ |
|---------------------------------|-----------|---------------|-------------------|-------------------|-------|
| bladeL                          | 0.012     | 0.486         |                   | -0.697, p = 0.012 | 0.486 |
| bladeW                          | 0.014     | 0.469         | 0.926, p < .001   | -0.039, p = 0.780 | 0.911 |
| sinusMinL                       | 0.208     | 0.153         | -0.069, p = 0.874 | 0.343, p = 0.443  | 0.156 |
| sinusNextL                      | 0.492     | 0.048         | 0.966, p = 0.014  | 0.893, p = 0.021  | 0.528 |
| petioleL                        | 0.262     | 0.124         | 0.812, p = 0.041  | 0.214, p = 0.546  | 0.463 |
| petioleW                        | p < 0.001 | 0.692         | 0.119, p = 0.649  | -0.749, p = 0.017 | 0.699 |
| bladeLtoWidestPoint             | 0.011     | 0.494         | 0.920, p < .001   | -0.062, p = 0.630 | 0.929 |
| bladeBaseAngle                  | 0.151     | 0.195         | -0.363, p = 0.386 | -0.695, p = 0.116 | 0.263 |
| TotalL.PL.BL                    | 0.019     | 0.438         | 1.03, p < 0.001   | 0.052, p = 0.459  | 0.979 |
| Area                            | 0.014     | 0.469         | 0.949, p < 0.001  | -0.024, p = 0.847 | 0.933 |
| SLA                             | 0.015     | 0.466         | 0.438, p = 0.188  | 0.987, p = 0.011  | 0.564 |
| PL.TL                           | 0.945     | $r^2 < 0.001$ | 0.347, p = 0.461  | 0.264, p = 0.572  | 0.062 |
| SinusRatio                      | 0.425     | 0.065         | -0.253, p = 0.580 | 0.078, p = 0.864  | 0.098 |
| BL.BW                           | 0.313     | 0.101         | -0.367, p = 0.408 | 0.062, p = 0.886  | 0.171 |
| BL.BLWP                         | 0.834     | 0.005         | 0.183, p = 0.699  | 0.196, p = 0.680  | 0.022 |
| sinus.v.width                   | 0.024     | 0.415         | -0.551, p = 0.103 | 0.259, p = 0.415  | 0.571 |
| sinus.v.width (no spruce woods) | 0.054     | 0.352         | -0.296, p = 0.152 | 0.163, p = 0.391  | 0.507 |

455

456

457 **Table 4. ANOVA for bladeL, SLA, PC1, PC2**

| Response |           | Df  | Sum of Squares | Mean Square | F-value | Pr(>F)    |
|----------|-----------|-----|----------------|-------------|---------|-----------|
| bladeL   | site      | 11  | 177345         | 16122.3     | 38.9996 | < 2.2e-16 |
|          | tree      | 24  | 83159          | 3465.0      | 8.3817  | < 2.2e-16 |
|          | residuals | 236 | 97562          | 413.4       |         |           |
| SLA      | site      | 11  | 1017054857     | 92459532    | 30.3766 | < 2.2e-16 |
|          | tree      | 24  | 703085034      | 29295210    | 9.6246  | < 2.2e-16 |
|          | residuals | 236 | 718331913      | 3043779     |         |           |
| PC1      | site      | 11  | 984.70         | 89.519      | 41.7620 | <2.2e-16  |
|          | tree      | 24  | 300.10         | 12.504      | 5.8335  | 8.101e-14 |
|          | residuals | 236 | 505.88         | 2.144       |         |           |
| PC2      | site      | 11  | 400.34         | 36.394      | 34.042  | <2.2e-16  |
|          | tree      | 24  | 318.70         | 13.279      | 12.421  | <2.2e-16  |
|          | residuals | 236 | 252.30         | 1.069       |         |           |

458

459

460

461 **FIGURE LEGENDS**

462

463 Figure 1. Locations of sampling sites for this study as well as mean annual temperature across  
464 the bur oak range. WorldClim temperature data are scaled to a factor of 10. Specific information  
465 about site, name, location, and number of samples collected can be found in Table 1.

466

467 Figure 2. Leaf trait measurements used in this study. All measurements used in this study were  
468 linear measurements or ratios of linear measurements, plus one angle. Details and definitions are  
469 found in Table 4.

470

471 Figure 3. Simple regressions of traits and environment that are significant at the 0.05 level. P-  
472 values are not corrected for multiple tests; a total of seventeen regressions were performed  
473 (Table 3).

474

475 Figure 4. Ordination of all individuals. Each color represents a different site: Assiniboine Forest  
476 (red), Bur Oak Woods (orange), Buttin Rock Access (yellow), Cherokee Park Trail (green),  
477 Mohawk Park (blue), Morton Arboretum (purple), Prairie Moon Nursery (brown), Red Rock  
478 Canyon State Park (deep pink), Spruce Woods Provincial Park (olive drab), Tallgrass Prairie  
479 Preserve (magenta), University of Minnesota Campus (black), Whiteshell Provincial Park (sky  
480 blue). Each symbol represents a different tree within the site, and each point represents a  
481 different leaf from the tree. Thus, each symbol / color combination appears in the plot up to four  
482 times for the up to four leaves per tree in the study.

483

484 Figure 5. Regressions of bioclim variables on latitude. Latitude shows up as the strongest single  
485 predictor of leaf morphology in the current study, as it integrates over both day length and  
486 several aspects of climate: bio 1 (mean annual temperature), bio 12 (mean annual precipitation),  
487 bio 4 (mean temperature seasonality).

488

489 Figure 6. Sampling simulations. Simulated sampling strategies accounted for covariance among  
490 traits within leaves; among leaves on trees within sites; and among trees within sites. Here, two  
491 estimates of power are reported: the number of groups of sites recognized as distinct from each  
492 other using Tukey's HSD at  $\alpha = 0.05$ ; and the probability of recognizing at least 50% of sites as  
493 distinct from each other. colors scale from darker as a higher number of groups are recognized,  
494 lighter as fewer are. Simulated numbers of sites distinguished (left panel) and probabilities of  
495 distinguishing at least 50% of simulated sites (right panel) are reported in each cell of the  
496 simulation.

497

498 Supplemental Figure S1. PCA based on eFourier analysis of leaf outlines.

499

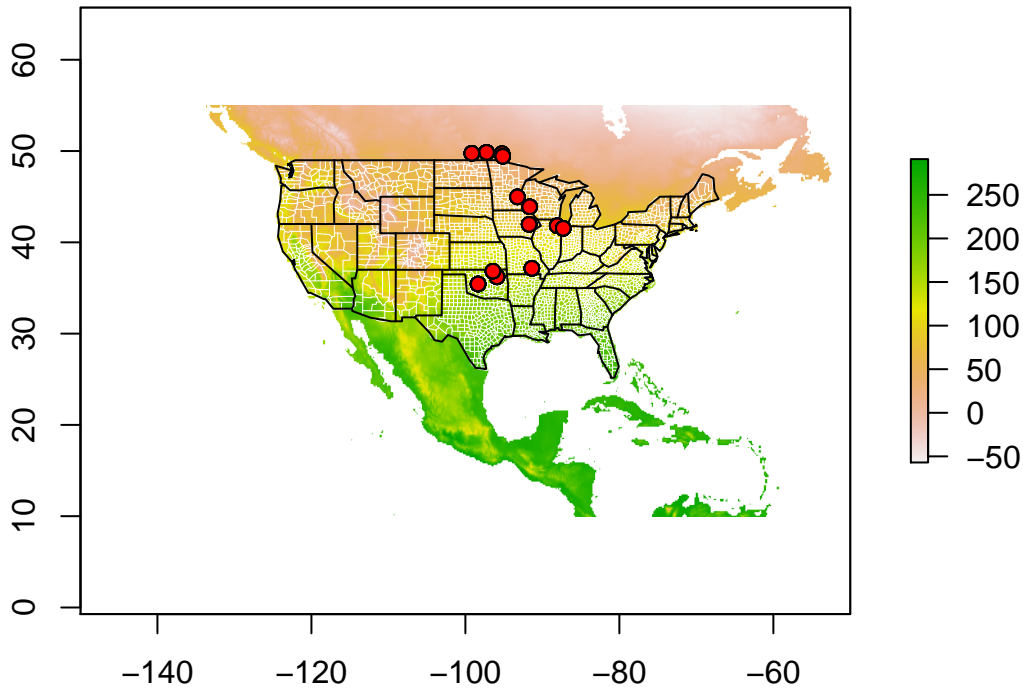

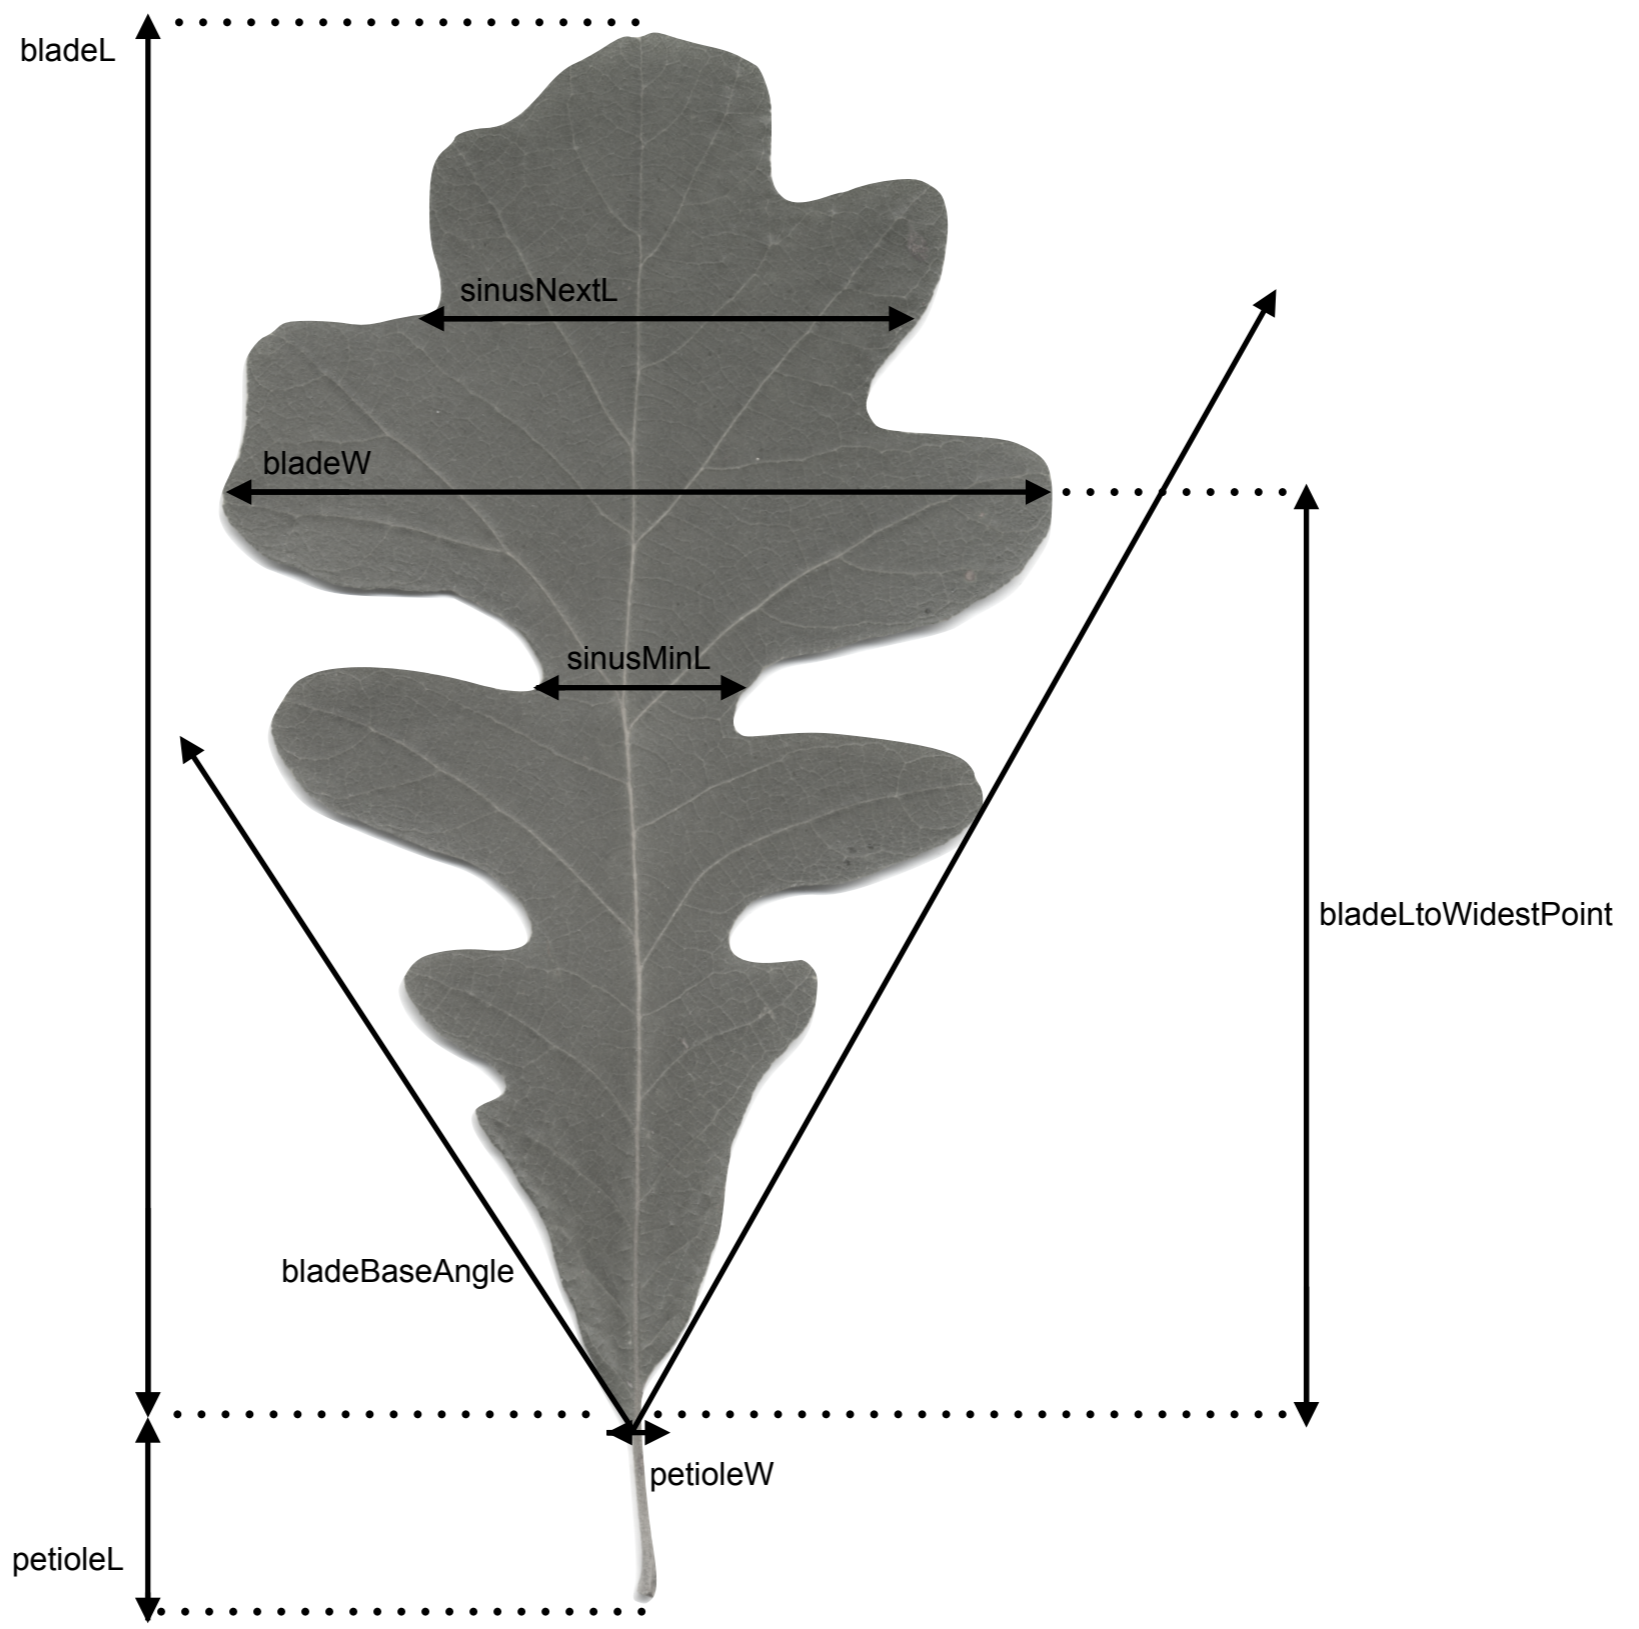

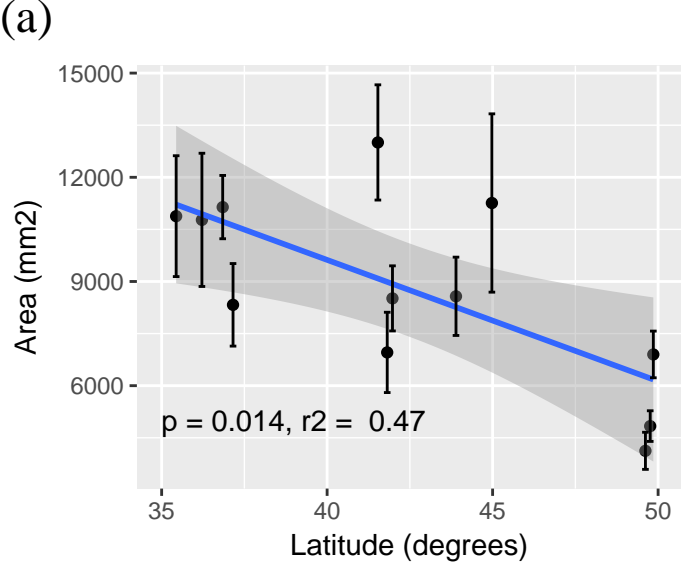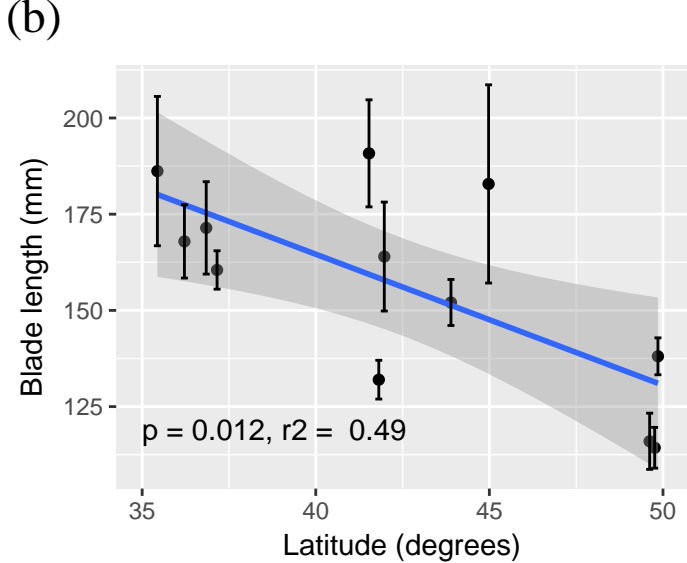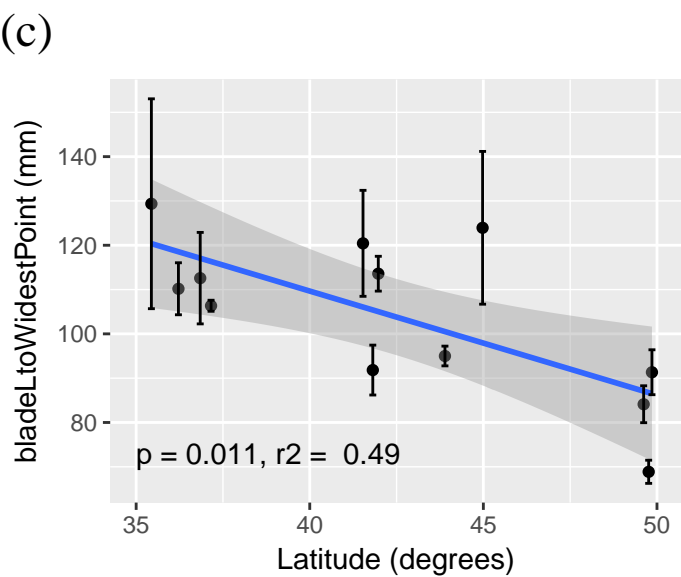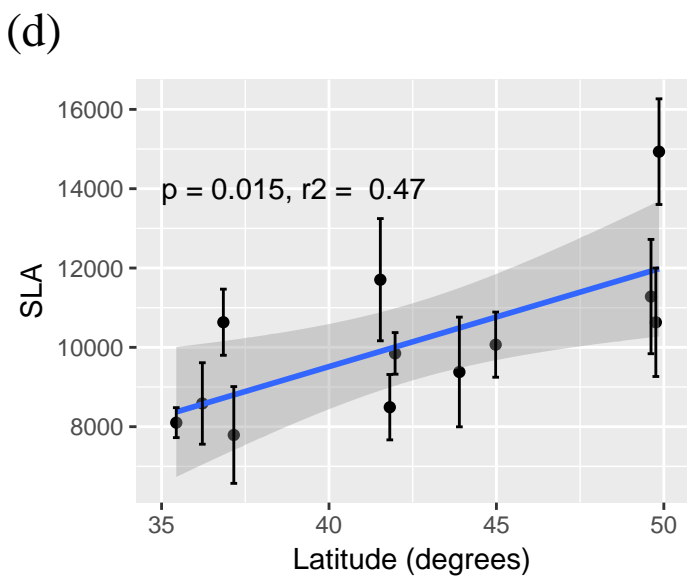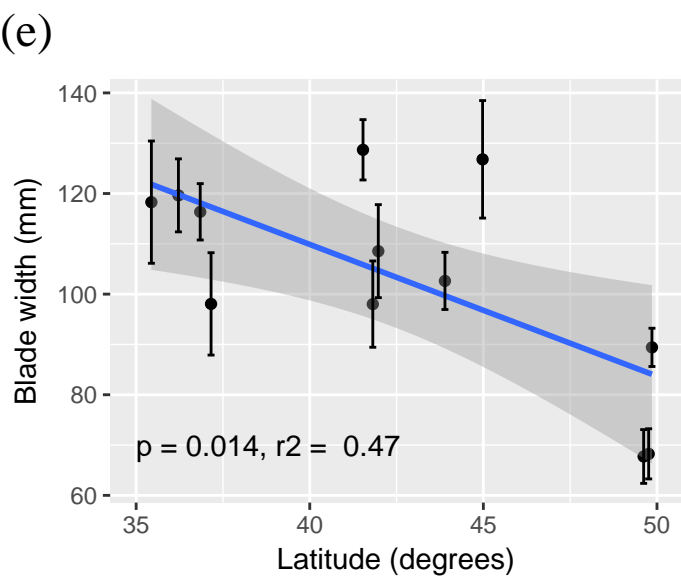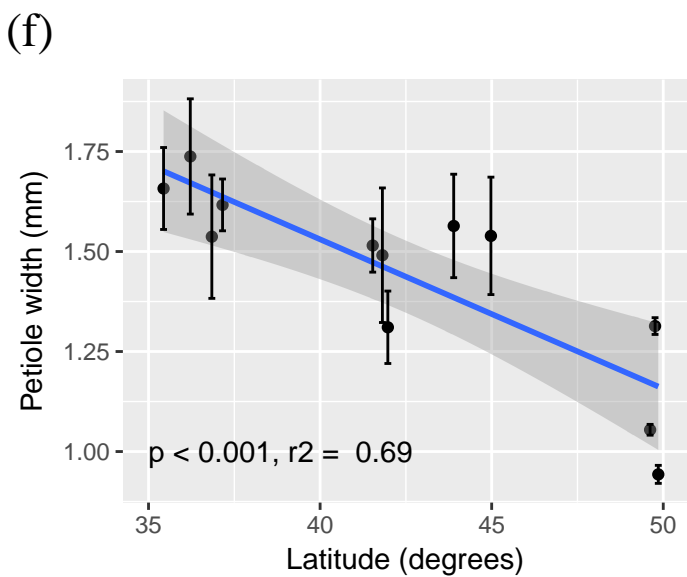

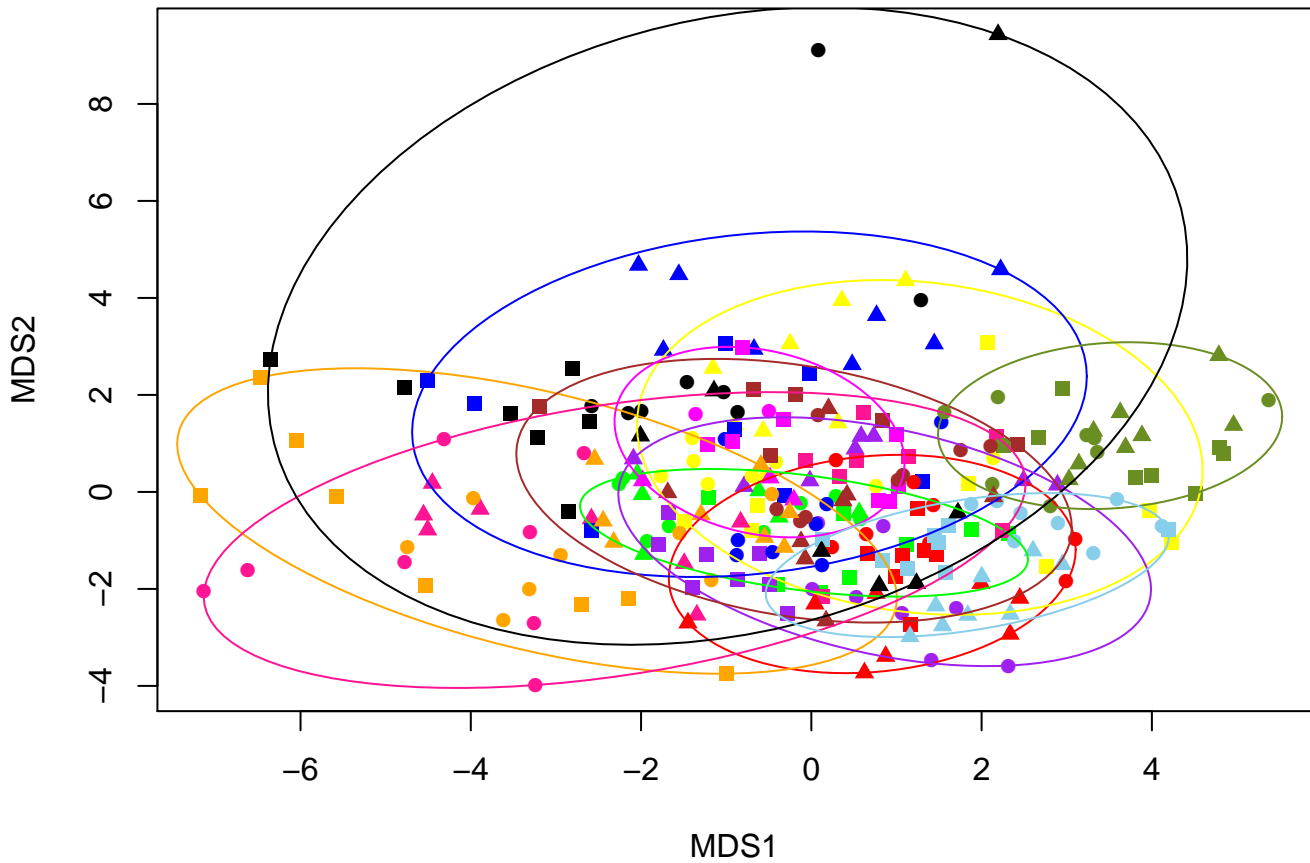



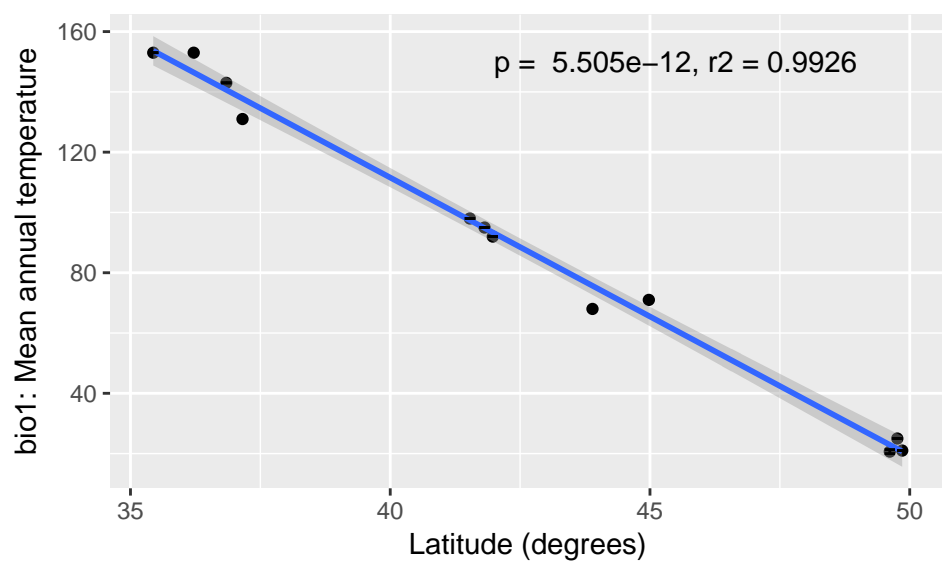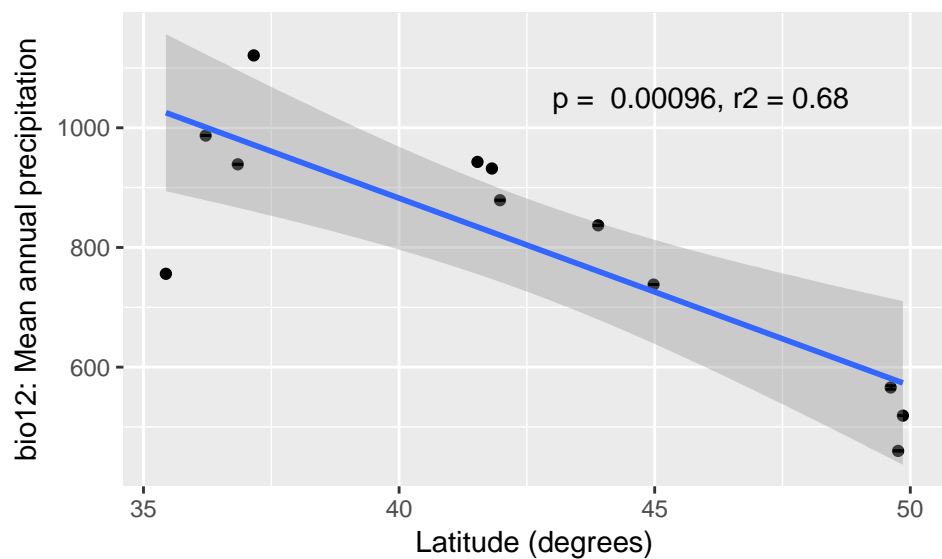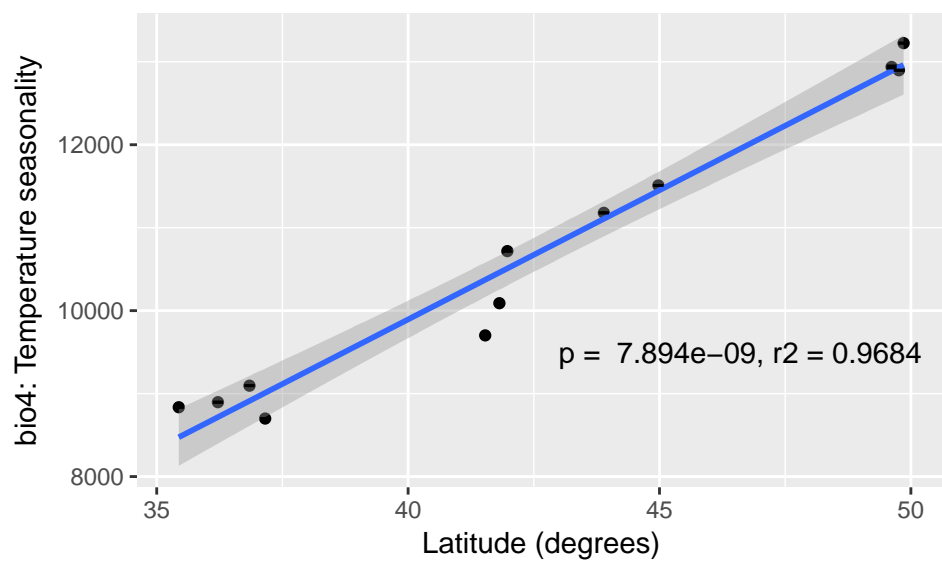

Mean groups recognized out of 20 populations

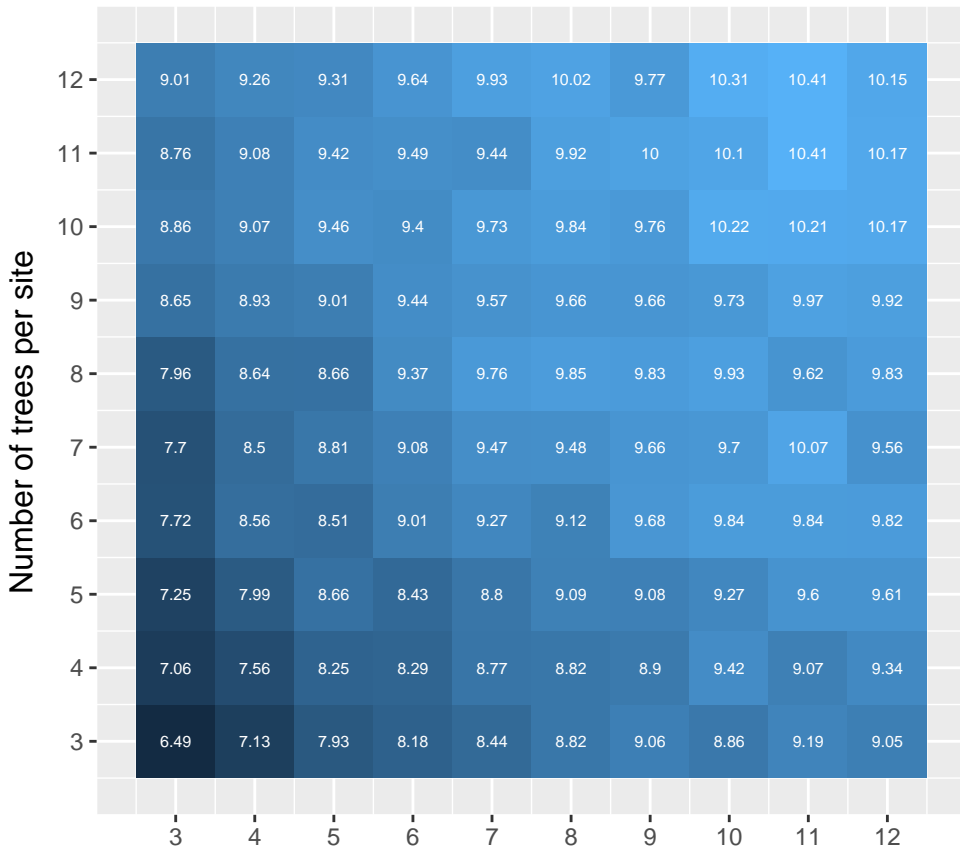

Probability of recognizing 50 percent of populations

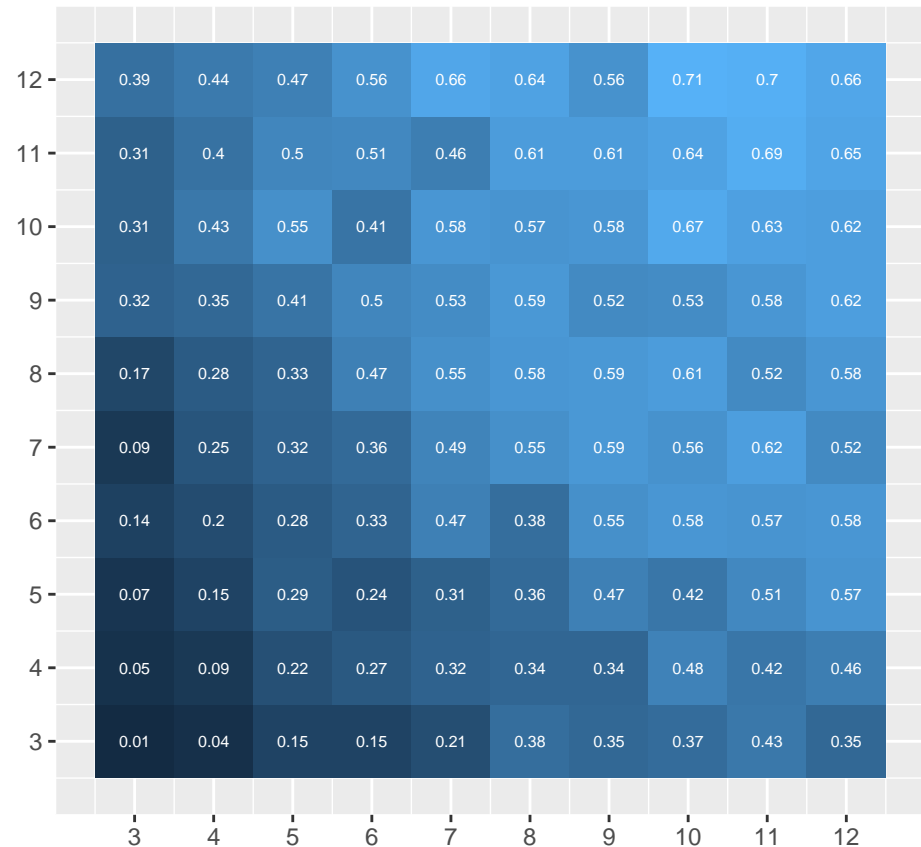

Number of leaves per tree
