1 **Leaf shape and size variation in bur oaks: An empirical study and simulation of sampling**  
2 **strategies**

3

4 Sara C. Desmond<sup>1,\*</sup>, Mira Garner<sup>1,2</sup>, Seamus Flannery<sup>1,3,4</sup>, Alan T. Whittemore<sup>5</sup> and Andrew L.  
5 Hipp<sup>1,5,6,\*</sup>

6

7 <sup>1</sup> The Morton Arboretum, Center for Tree Science, 4100 Illinois Route 53, Lisle, IL 60532, USA

8 <sup>2</sup> Current address: The University of British Columbia, UBC Faculty of Forestry, Vancouver, BC  
9 Canada V6T 1Z4

10 <sup>3</sup> The University of Chicago Laboratory Schools, 1362 East 59<sup>th</sup> St., Chicago, IL 60637, USA

11 <sup>4</sup> Current address: Haverford College, 370 Lancaster Avenue, Haverford, PA 19041, USA

12 <sup>5</sup> U.S. National Arboretum, 3501 New York Ave NE, Washington, DC 20002, USA

13 <sup>6</sup> The Field Museum, 1400 S Lake Shore Drive, Chicago, IL 60605, USA

14 <sup>7</sup> Author for correspondence (email: [ahipp@mortonarb.org](mailto:ahipp@mortonarb.org))

15 \* These authors contributed equally to writing and data analysis for this paper.

16

17 **ABSTRACT**

18 PREMISE: Oaks are notoriously variable in leaf morphology, but little is known regarding the  
19 partial contributions of climate, population, latitude, and individual tree to total variation in leaf  
20 morphology. This study examines the contributions of within-tree, among-tree, and among-site  
21 variation to the total variation in leaf morphology in bur oak (*Quercus macrocarpa*), one of  
22 North America's most geographically widespread oak species.

23 METHODS: Samples were collected from four sites each at northern, central, and southern  
24 latitudes of the bur oak range. Ten leaf size traits were measured, and variance in these traits and  
25 eight ratios was partitioned into tree, population, and latitude components. We then  
26 parameterized a series of leaf collections simulations using empirical covariance among leaves  
27 on trees and trees at sites.

28 KEY RESULTS: Leaf size measurements were highly responsive to latitude. Site contributed  
29 more than tree to total variation in leaf morphology. Simulations suggest that power to detect  
30 among-site variance in leaf morphology can be estimated most efficiently with increases in either  
31 leaves per tree (10-11 leaves from each of 5 trees) or trees per site (5 leaves from each of 10+  
32 trees).

33 CONCLUSIONS: Our study demonstrates the utility of both simulating sampling and controlling  
34 for variance in sampling for leaf morphology, whether the questions being addressed are  
35 ecological, evolutionary, or taxonomic. Simulation code is provided to help researchers plan  
36 sampling strategies to maximize the ability to detect among-site variance in leaf morphology.

37

38 Keywords: climate; Fagaceae; latitude; leaf morphology; leaf size; *Quercus macrocarpa*;  
39 sampling simulation

40

41 Running head: Leaf morphological variation in bur oak

42 Manuscript received \_\_\_\_\_; revision accepted \_\_\_\_\_.

43

## 44 INTRODUCTION

45 Leaf morphology variation strongly influences species' ability to compete and survive in different  
46 environments (Givnish, 1987). It has long been recognized that there is a correlation between  
47 temperature and the proportion of species exhibiting leaf dissection and tothing, and for more  
48 than a century this correlation has been used to model temperature changes in paleobotanical  
49 studies (Bailey and Sinnott, 1915, 1916; Greenwood et al., 2004; Royer and Wilf, 2006). Leaf size  
50 similarly has a well demonstrated correlation with temperature and resource availability (Bragg  
51 and Westoby, 2002; Peppe et al., 2011; McKee and Royer, 2017; Wright et al., 2017; Li et al., 2020),  
52 and traits such as compounding and phyllotaxy, base and apex morphology, leaf shape, and  
53 epidermal pigmentation vary along gradients of light availability, nutrient availability, soil  
54 moisture, temperature, or combinations of these (Givnish, 1987; Schmerler et al., 2012). In a global  
55 field study from 92 sites (Peppe et al., 2011), multiple regressions of climate (both precipitation  
56 and temperature) on leaf area, tooth number, and percent of species at the site with tothing  
57 showed relatively high predictive ability, inferred from the low standard error of the models  
58 ( $\pm 4^{\circ}\text{C}$ ). However, while the sign of this correlation—more tothing and lobing in cooler areas—  
59 is convergent across clades and geographic regions, the slope of the relationship between climate  
60 and leaf morphology varies among species (McKee et al., 2019), geographic regions  
61 (Greenwood et al., 2004; Aizen and Ezcurra, 2008), and phylogenetic lineages (Little et al.,  
62 2010; Burnham and Tonkovich, 2011; Walls, 2011).

63 Many of these traits vary both among and within species, and correlations between  
64 community-weighted mean trait values at the site level are mirrored within species on short time  
65 scales, with tothing and leaf lobing correlated with cooler temperatures in most species studied  
66 as well as across communities (McKee and Royer, 2017; McKee et al., 2019). Moreover, the  
67 morphology of leaves can vary highly within communities (Givnish, 1987). Within forest trees in

68 particular, variation due to position on the tree (Blue and Jensen, 1988; McCarthy and Mason-  
69 Gamer, 2019), light availability (Abrams and Kubiske, 1990; Ducrey, 1992), drought (Abrams,  
70 1994; Abrams et al., 1994) as well as genetic differences among trees within species (Abrams,  
71 1994; Ramírez-Valiente et al., 2017) all contribute to variation in leaf shape and size. Moreover,  
72 while sampling of a small number of leaves per population has been argued to be sufficient for  
73 detecting site level patterns in climate based in paleobotanical studies (Royer et al., 2005; Peppe  
74 et al., 2011), the relative contribution of within-tree, among-tree within-population, and among-  
75 population variation to total morphological variation is not clear in many tree species, leading to  
76 observations for example that variation among leaves on a single tree is sometimes as great as  
77 the variation observed among named species (e.g., McCarthy and Mason-Gamer, 2019).

78         Oaks have long been noted for their particularly variable morphology at all levels (among  
79 leaves on a single tree, among trees of a single population, and among populations of a single  
80 species). Detailed studies in oaks have utilized either linear measurements (Baranski, 1975; Blue  
81 and Jensen, 1988; Bruschi et al., 2003) or landmark approaches (Jensen, 1990). Both approaches  
82 have demonstrated that while variation among positions within a tree in both leaf shape and size  
83 may exceed variation among sites, overall variance is generally greater among sites. These  
84 papers have highlighted that studies investigating among-population divergence patterns can  
85 minimize within-individual morphological variance by holding sampling season and leaf position  
86 on the tree constant (i.e., high or low on the tree and disposed toward the edges or inside of the  
87 canopy) (Sokal et al., 1986; Blue and Jensen, 1988; Bruschi et al., 2003). Understanding these  
88 sources of variance in leaf shape and size is foundational to understanding how introgression,  
89 adaptation, and neutral variation influence leaf morphology both among and within species  
90 (Jensen et al., 1984; Howard et al., 1997; Kremer et al., 2002; González-Rodríguez et al., 2004;

91 González-Rodríguez and Oyama, 2005) and the balancing act that trees face in maximizing  
92 photosynthetic efficiency while minimizing the risks of drought, freezing, herbivory and other  
93 stresses (Wright et al., 2004). However, it is not clear what sampling strategy (leaves per  
94 individual, individuals per population) is most efficient for estimating among-population  
95 differences in leaf size and shape. Whereas simple simulation tools exist for planning sampling  
96 strategies for population genetics (Hoban et al., 2013; Hoban, 2014) and conservation of genetic  
97 diversity (Hoban, 2019; Hoban et al., 2020), morphological sampling strategies that take into  
98 account covariance among leaves on a tree, among trees in a population, and among traits  
99 measured are lacking. Given that resources for sampling are limited, tools to help plan sampling  
100 strategies would make it possible to answer questions more definitively with the same amount of  
101 field work.

102         We sampled leaves across a broad geographic range of bur oak (*Quercus macrocarpa*  
103 L.), one of North America's most geographically widespread oak species, which ranges from  
104 Manitoba to the Gulf of Mexico (Fig. 1) to (1) quantify the relative contributions of within-tree,  
105 among-tree, and among-site variation to the total variation in leaf morphology in bur oak; (2) use  
106 this information to simulate how much sampling is required to detect among-site differences in  
107 leaf morphology; and (3) test the support for our observations in field and herbarium that leaf  
108 size and leaf-lobing increase from north to south in bur oak. Bur oak serves as an excellent  
109 model species for this study because it has exceptionally high morphological variation  
110 (Hamerlynck and Knapp, 1994; Koenig et al., 2009) and an extensive distribution, ranging from  
111 Manitoba to the Gulf of Mexico (Little, 1971; Stein et al., 2003). The species also exhibits high  
112 within-population molecular genetic variation (Schnabel and Hamrick, 1990; Garner et al., 2019;  
113 Hipp et al., 2019), suggesting that an investigation of the leaf morphological variation among vs

114 within sites is appropriate as a precursor to future studies of what environmental factors  
115 contribute to morphological variation in bur oak leaves.

116

## 117 **MATERIALS AND METHODS**

118 *Collections and site attributes*—During the summer and fall of 2017, samples were collected  
119 from four sites each at northern, central, and southern latitudes of the bur oak range (Fig. 1).  
120 Sites were selected in conjunction with sampling for ongoing population genetic studies of  
121 *Quercus macrocarpa* (Garner et al., 2019; Hipp et al., 2019) with the criteria that (1) preliminary  
122 collections suggested they would have numerous bur oaks, and (2) additional white oaks were  
123 present at the site or nearby. Most were forested, but some (e.g. The Morton Arboretum, Prairie  
124 Moon Nursery) were savannas. The northern sites sampled were located in Manitoba  
125 (Assiniboine Park, Whiteshell Provincial Park, and Spruce Woods Provincial Park) and  
126 Minnesota (The University of Minnesota – Twin Cities). The central sites sampled were located  
127 in Illinois (The Morton Arboretum), Indiana (Burr Oak Woods), Iowa (Cherokee Park Trail), and  
128 Minnesota (Prairie Moon Nursery). The southern sites sampled were located in Oklahoma  
129 (Tallgrass Prairie Preserve, Mohawk Park, Red Rock Canyon State Park) and Missouri (Buttin  
130 Rock Access). Trees selected at each site were mature, full-size trees; where possible, trees at a  
131 given site were located a minimum of 100 feet from each other. For each site, latitude and  
132 longitude were recorded to a precision of 5 decimal places (Table 1). We extracted 19 bioclim  
133 variables from the WorldClim database (resolution = 1 km<sup>2</sup>) and linked them to our dataset in R  
134 v. 3.4.4 (R Core Team, 2018) using raster v 2.6-7 (Hijmans, 2017) and sp\_1.4-2 (Pebesma and  
135 Bivand, 2005; Bivand et al., 2013) packages. The map of collection sites was made using maps  
136 3.3.0 (Becker et al., 2018).

137 Three bur oak trees were sampled from each site using a pole pruner at two or four  
138 meters in height, based on tree height. For each sample, a terminal branch was cut down from  
139 each of the cardinal directions (N, S, E, W), determined using a compass. Only outermost  
140 branches were sampled. Two endmost leaves were removed from each branch and immediately  
141 pressed, for a total of 8 leaves per individual, 272 leaves overall. If the endmost leaves were  
142 highly damaged, the next leaves in from the end were selected. Leaves that were highly  
143 misshapen or broken were excluded from analyses (see 'use' field in dataset archived in GitHub,  
144 which indicates which leaves were excluded from analysis). Leaves were dried in a standard  
145 herbarium drier prior to measuring, then redried at 49° C for a minimum of 48 hours and  
146 weighed on a PB303 Delta Range scale to obtain dry mass.

147

148 ***Morphological Measurements***—Ten size measurements (mm) were made on each leaf  
149 using ImageJ (Schneider et al., 2012): blade length (bladeL), blade width (bladeW), width of  
150 blade between deepest pair of sinuses (sinusMinW), petiole length (petioleL), petiole width  
151 (petioleW), length of lamina from base to widest point (bladeLtoWidestPoint), width of blade  
152 between pair of sinuses just above the deepest pair (sinusNextW), total length (BL.PL), leaf base  
153 angle (bladeBaseAngle), and leaf area (Area) (Table 2, Fig. 2). Seven ratios were also calculated  
154 from these measurements to distinguish leaf shape from leaf size (González-Rodríguez and  
155 Oyama, 2005): petioleL / BL.PL (PL.TL); sinusMinL / sinusNextL (SinusRatio); bladeL /  
156 bladeW (BL.BW); petioleL / petioleW (PL.PW); BL.BW / PL.PW (BL.BW.over.PL.PW);  
157 bladeL / bladeLtoWidestPoint (BL.BLWP); lobedness, calculated as blade width between the  
158 deepest sinuses divided by total blade width, abbreviated (sinus.v.width); and specific leaf area

159 (SLA), calculated as leaf blade area / leaf blade mass (Table 2). A panel of significant  
160 regressions was created using the R core functions and gridExtra 2.3 (Auguie, 2017).

161 To investigate lobedness using more complex morphometric approaches, black and white  
162 silhouettes of each leaf image were created using ImageJ and converted into jpeg files, with  
163 petioles whited out manually. The jpeg files were then imported into R and converted into  
164 outlines using the R package Momocs v 1.3.2 (Bonhomme et al., 2014). An additional set of 40  
165 leaves that did not import well into Momocs or had leaf outlines that did not impair manual  
166 measurements but that were badly non-representative of typical leaf form were deleted at this  
167 stage (see scripts 05a and 05b in the GitHub repository for enumeration of these). We initially  
168 investigated shape variation using elliptical Fourier analysis (EFA), which generates shape-  
169 representative variables that are independent of size (Crampton, 1995) and is well suited to  
170 comparing complex outlines that vary in shape and lobedness (Tracey et al., 2006). For these  
171 analyses, we normalized the outlines using four landmarks placed on the top, bottom, left, and  
172 right of each outline and analyzed the leaf outlines using 17 harmonics (the default setting).

173 We also used Momocs to measure circularity (as the square of perimeter over the area)  
174 (Rosin, 2005) and Haralick's circularity (as the mean distance from the leaf centroid to the  
175 perimeter pixels divided by the standard deviation of those distances) (Haralick, 1974).  
176 Haralick's circularity is less sensitive to shape raggedness than the standard measure of  
177 circularity and increases with increasing circularity; standard circularity decreases with  
178 increasing circularity. We aggregated both circularity measures to individual and then  
179 individuals to site to examine site-level effects of latitude on leaf circularity using simple least-  
180 squares regressions.

181



182            *Statistical Analysis—Linear Regressions and ANOVA*—All statistical analyses were  
183 conducted in R. Seventeen least squares were performed on all leaf linear measurements using  
184 the lm function to assess which leaf traits were most responsive to latitude at the site level,  
185 aggregating leaf traits first to tree, then tree mean trait values to site. An additional regression  
186 was performed of Haralick circularity on latitude, at the site level. Data were visualized using  
187 ggplot2 3.3.2 (Wickham, 2009). In addition to simple regressions, we corrected for size by  
188 conducting multiple regressions for all of our leaf traits using the lm function and including  
189 blade length (bladeL) as a covariate. We used data scaled to a mean of zero and unit variance.

190            We performed a principal component analysis (PCA<sub>MORPH</sub>) on all scalar measurements  
191 and ratios using the prcomp function. The point MN-MG788 was removed prior to analysis  
192 because it significantly skewed the ordination. Two-dimensional nonmetric multidimensional  
193 scaling on a Euclidean distance matrix based on principal component axes was used to visualize  
194 the data. The scaling type was ‘centering’ with PC rotation. We used the ordiellipse function in  
195 vegan 2.4-5 (Oksanen et al., 2017) to plot bounding ellipses on our ordination.

196            Two-way ANOVA was used to assess the relative contributions of site and tree to the  
197 total variation in bladeL, SLA, PC1<sub>MORPH</sub> and PC2<sub>MORPH</sub>. Principal components one and two  
198 were extracted from the principal component analysis mentioned above and attached to our  
199 original dataset. ANOVA was conducted on the linear model of bladeL, SLA, PC1<sub>MORPH</sub>, and  
200 PC2<sub>MORPH</sub> regressed against site and tree. We chose PC1<sub>MORPH</sub> and PC2<sub>MORPH</sub> for this analysis  
201 because together they accounted for 52.5% of the variance.

202

203            *Simulations of sampling strategies*—We assessed the effectiveness of alternative  
204 sampling scenarios to distinguish differences among populations by using our estimates of

205 variation to generate simulated morphological datasets for 20 populations that ranged from three  
206 to 12 trees per site and three to 12 leaves per tree, a total of 100 sampling strategies. For each  
207 strategy, we simulated 100 replicate datasets of all ten direct morphological measurements using  
208 a hierarchical simulation strategy, using the data we collected to parameterize the simulation. For  
209 each replicate, site-level means for all 10 traits were drawn from the multivariate normal  
210 distribution with trait means and covariance  $\mathbf{C}_{\text{site}}$  estimated from observed site means for all  
211 traits;  $\mathbf{C}_{\text{site}}$  is thus based on variance within and covariance among traits that we observed,  
212 averaged for each site. Tree-level means were then drawn from the multivariate normal  
213 distribution with the simulated site-level means and the covariance matrix  $\mathbf{C}_{\text{tree}}$  estimated from  
214 tree means at each site and averaged across sites: tree-level means were thus assumed to have a  
215 constant variance and covariance among sites. Finally, individual leaf measurements for each  
216 tree were drawn from the multivariate normal distribution with means from the second  
217 simulation stage and covariance matrix  $\mathbf{C}_{\text{leaf}}$  estimated from the leaf measurements for each tree  
218 separately, then averaged across trees.

219         The resulting 100,000 data matrices ranged from 180 to 2,880 simulated leaves, with trait  
220 covariance and variance among leaves within trees, among trees within populations, and among  
221 populations modeled according the measurements we made for this project. Because leaf size  
222 showed particularly strong variation among populations, we utilized ANOVA of bladeL on site +  
223 tree, combined with Tukey's Honest Significant Different (HSD) method to assess the number of  
224 populations that could be differentiated from one another in each simulated data matrix. The  
225 number of letters needed for a compact letter display using Tukey's HSD at  $\alpha = 0.05$  was used as  
226 a proxy for the number of groups that could be distinguished for each simulated dataset. Both the  
227 average number of groups distinguished for each simulated dataset and the percent of

228 simulations that distinguish at least 50% of populations (10 / 20) are reported as estimates of  
229 statistical power. All simulations were conducted in R using mvtnorm v 1.0-11 (Genz and Bretz,  
230 2009; Genz et al., 2019) (Genz et al. 2017), and code for performing simulations is archived in  
231 GitHub and Zenodo (<https://github.com/andrew-hipp/oak-morph-2020>;  
232 <https://doi.org/10.5281/zenodo.4213821>). The simulation code can be installed as package  
233 ‘traitsPopSim’ from GitHub (<https://github.com/andrew-hipp/traitsPopSim>) and run using  
234 multivariate traits collected in a similarly structured design (measurements nested within  
235 individuals nested within sites; sample data included in the package are from the current study).

236

## 237 **RESULTS**

238 *Analysis of empirical data*—Among the size characters, bladeL, bladeW, BL.PL, petioleW, and  
239 Area all showed significant variation in response to latitude (Table 3, Fig. 3). Petiole width was  
240 the size trait that was the most significant ( $P < 0.001$ ). Petiole length, sinusMinL, sinusNextL,  
241 and blade base angle were not significantly predicted by latitude (Table 3). Two ratios were  
242 significantly correlated with latitude: SLA ( $r^2 = 0.466$ ,  $P = 0.015$ ) and the ratio of sinus depth to  
243 leaf width (sinus.v.width, a proxy for lobedness;  $r^2 = 0.415$ ,  $P = 0.024$ ) (Table 3). In regressions  
244 controlling for size by including bladeL as a covariate, sinusNextL ( $P = 0.021$ ), petioleW ( $P =$   
245  $0.017$ ), bladeL ( $P = 0.012$ ) and SLA ( $P = 0.011$ ) were the only traits significantly affected by  
246 latitude alone (Table 3; Fig. 3). Regressions of all traits measured, significant or not, are  
247 presented in the supplement (Supplemental Fig. S1). Standard circularity (perimeter squared over  
248 area) was strongly affected by latitude ( $r^2 = 0.506$ ,  $P = 0.0043$ ; Fig. 4), Haralick circularity  
249 (mean distance from leaf centroid to boundary pixels over the standard deviation of these

250 distances) was weakly predicted by latitude ( $r^2 = 0.259$ ,  $P = 0.0631$ ; Fig. 4). Under both  
251 measures, southern leaves exhibited stronger lobing, northern leaves exhibited greater circularity.

252 PCA on the EFA yielded very high loading on PC1 (58%), very low on PC2 (8%), and a  
253 strong curvilinear relationship between PC1 and PC2 (Supplemental Fig. S2). This non-  
254 independence between PC1 and PC2 can arise because variation is broad, such that the ends of  
255 the PC cloud have little in common, or because the variation is dominated by a single variable  
256 (Minchin, 1987). In our study, PC1 was dominated by size (Pearson's product moment [ $r$ ] =  
257 0.251 for blade width, 0.227 for blade area) and latitude ( $r = -0.213$ ), and PC2 was more  
258 strongly associated with shape ( $r = 0.395$  for the ratio of blade length to blade width,  $-0.375$  for  
259 width of the sinus distal to the deepest sinus, 0.348 for the ratio of the width of the blade in the  
260 deepest sinus width of the blade in the second-deepest sinus), and to a lesser extent leaf blade  
261 width ( $r = -0.240$ ).

262 The effects of site and tree on bladeL, SLA, and the first two axes of the morphological  
263 (non-EFA) ordination (Supplemental Fig. S3) were significant based on ANOVA ( $P \ll 0.001$ ;  
264 Table 4). Although site and tree both had significant effects, site contributed more than tree to  
265 the total variation in leaf morphology (F-values for site range from 30.38–41.76, while F-values  
266 for tree range from 5.83–12.4). Mean annual temperature among our sites ranged from 2.1–  
267 15.3°C, and mean annual precipitation from 460 – 1121 mm. On average, leaf bladeL averaged  
268 34.0 mm shorter and SLA 50.39 mm<sup>2</sup>/g greater for each increase 10 degrees in latitude  
269 (northward).

270 Regressions of individual traits on site-level temperature and moisture conditions inferred  
271 from BioClim closely matched regressions of those same traits on latitude. The latitudinal  
272 gradient in our study correlated tightly with climate: increases in latitude entail decreases in

273 mean annual precipitation (Bio12;  $R^2 = 0.6803$ ,  $p < 0.01$ ) and temperature (Bio1;  $r^2 = 0.99$ ,  $p \ll$   
274 0.01), and an increase in temperature seasonality (Bio4;  $R^2 = 0.97$ ,  $p \ll 0.01$ ) (Fig. 5). As a  
275 consequence, climate is not considered further in this study, but only latitude.

276

277 *Analysis of simulated data*—The mean number of groups distinguished in our  
278 simulations ranged from 5.49 to 10.41, and the probability of distinguishing 50% (10 / 20) of the  
279 populations based on blade length ranged from 0.01 to 0.71 (Fig. 6). The sampling strategy we  
280 implemented for this study, 3 trees per site, 8 leaves per tree, had a power of only 38% to  
281 identify a number of groups equal to 50% of the sites sampled. Increasing power to at least 50%  
282 would entail increasing sampling to 11–12 leaves from each of 5 trees, 5 leaves from each of 10–  
283 11 trees, or any of a number of scenarios intermediate between these extremes.

284

## 285 **DISCUSSION**

286 Our study has three important findings. First, among-tree and among-site variation  
287 contribute significantly to leaf shape and size variation in bur oaks. Consequently, within-  
288 individual and within-population sampling are both important components of a sampling strategy  
289 aimed at characterizing among-population variation in oak morphology. This complements  
290 observations of high variance in temperate tree leaf morphology (Bruschi et al., 2003; Apostol et  
291 al., 2017; McCarthy and Mason-Gamer, 2019), demonstrating that among-site variation  
292 contributes most strongly to total leaf variation, but that within-site and within-tree sampling are  
293 important to detecting among-site variation in leaf shape and size. Second, we implement a  
294 general parametric simulation method and use it to demonstrate that our sampling strategy,  
295 which included 8 leaves from different positions on each of 3 trees per site, was not optimal for

296 resolving among-site variation, even if it was sufficient to demonstrate the relationship between  
297 morphology and latitudinal gradients. This simulation approach and the package provided  
298 (traitsPopSim) can serve as tools to guide morphological sampling in similar hierarchical studies,  
299 where sites are composed of multiple individuals and individuals are each represented by  
300 multiple measurements. Finally, our study demonstrates that leaf size and lobing decrease from  
301 south to north in bur oak, while specific leaf area increases. In cross-species comparisons, leaf  
302 size and SLA generally covary, suggesting that adaptive leaf variation in bur oak may rest in part  
303 on a tradeoff between leaf size and lobing. Our study of one of North America's most  
304 widespread oak species is thus a jumping-off point for understanding adaptive leaf variation  
305 across the oaks of the Americas.

306

307 *Leaf size and shape variance are influenced by population and individual*—Our results  
308 show that among-site variance for all traits investigated ( $F_{11,236} = 30.38\text{--}41.76$ ) contributes more  
309 to total variance in leaf morphology than among-tree variance ( $F_{11,236} = 5.83\text{--}12.42$ ), though both  
310 variance components are significant ( $P \ll 0.001$ ; Table 4). This ability to distinguish among  
311 sites is important in relating leaf variation to latitude or climatic predictors and measuring the  
312 slope of the relationship resulting from selective pressures along climatic gradients (Wright et  
313 al., 2004). Moreover, our results demonstrate that sampling three trees per site, and eight leaves  
314 per tree is sufficient to correlate shape and size to latitude and climate. However, while among-  
315 site variance is higher than among-tree variance within sites (Table 4), the variance we observe  
316 among leaves within a single tree is still quite high. A previous study (Bruschi et al., 2003) found  
317 that among-leaf morphological variance on a tree is higher than among-tree variance for most  
318 traits investigated, and that this was in accord with findings from earlier work (Baranski, 1975;

319 Blue and Jensen, 1988). However, in Bruschi (2003), leaves were sampled from both inner and  
320 outer positions on the branch to maximize variance. In our study, we deliberately minimized this  
321 source of variance by sampling leaves at a relatively constant height and all from the outer  
322 branch position, and we further selected the endmost leaves from each branch sampled.

323 *Simulating sampling strategies*—The simulations we conducted of alternative sampling  
324 strategies suggests the strategy we selected of three trees per site and eight leaves per tree has  
325 only a 38% probability of distinguishing 50% of 20 populations drawn at random from  
326 distributions we observed. It may well be that our difficulty relating shape to climate is due to a  
327 lack of sampling within sites and trees. Based on the variance observed in leaf length alone,  
328 achieving a 50% probability of distinguishing 50% of populations would require 11–12 leaves  
329 from each of 5 trees per site, 5–6 leaves from each of 11–12 trees per site, or something in  
330 between (Fig. 6).

331 Our simulations suggest two recommendations for others conducting similar studies.  
332 First, researchers are recommended to minimize the high within-individual variance observed in  
333 previous studies (Blue and Jensen, 1988; Bruschi et al., 2003; McCarthy and Mason-Gamer,  
334 2019) by sampling leaves of a common age / developmental stage, in the same position on the  
335 twig, and from twigs with comparable positions on the plants. Second, simulating alternative  
336 sampling strategies will help maximize the ability to distinguish among populations, given  
337 limited time and resources. Researchers can use preliminary data to simulate alternative  
338 sampling strategies and estimate their power will be to distinguish populations under different  
339 scenarios. The tools we developed for this study require only a matrix of traits and assignment of  
340 those traits to populations and individuals to perform the simulations we describe above. We  
341 expect that their use will facilitate planning of sampling designs for similar projects.

342           ***Leaf size, lobing, and SLA are predicted by latitude***— The measurements for each of our  
343 leaves were well predicted by their latitude of origin: leaves were thicker, larger, and had deeper  
344 lobes at southern latitudes, where leaves are exposed to warmer temperatures and higher  
345 precipitation, and have longer growing seasons; and leaves were smaller, thinner, and had  
346 shallower lobes at northern latitudes, where cold temperatures reduce water stress. This is in line  
347 with previous studies demonstrating that leaf area covaries positively with temperature (Moles et  
348 al., 2014; Wright et al., 2017) while SLA covaries negatively (Moles et al., 2014), and that leaf  
349 circularity tends to increase in northern or cooler environments (Halloy and Mark, 1996;  
350 Schmerler et al., 2012). Our results also parallel previous work in *Quercus ilex*, which exhibited  
351 a similar leaf size gradient from north to south in the western Mediterranean basin, where  
352 southern regions were likewise warmer and had higher amounts of precipitation than northern  
353 regions (García-Nogales et al., 2016).

354           Our findings suggest a possible compensatory relationship between larger size and lobing  
355 in bur oak. Community-level studies tend to show a higher frequency of lobed leaves in cooler  
356 temperatures (Royer et al., 2005). These responses are individualistic, however, and among-  
357 population responses in some species show no response or greater lobing in warmer temperatures  
358 (Royer et al., 2008; McKee and Royer, 2017; McKee et al., 2019). Leaves that are deeply lobed  
359 may be better adapted to warmer climates, because deeply lobed and narrow leaves have a  
360 thinner leaf boundary layer, facilitating more rapid cooling (Givnish, 1987; McDonald et al.,  
361 2003). In our study, the ratio of sinus depth to leaf width (sinus.v.width) shows a weak negative  
362 correlation with latitude ( $b = 0.013$ ,  $P = 0.024$ ), but this result is strongly affected by one site,  
363 Red Rock Canyon, which had an exceptionally low value. When this outlier is removed, the  
364 correlation is no longer significant ( $b = 0.007$ ,  $P = 0.054$ ). In multiple regressions with scaled



365 data and bladeL as a covariate, however, depth of the sinus immediately above the deepest sinus  
366 (sinusNextL) was significantly influenced by latitude ( $b = 0.893$ ,  $P = 0.021$ ), even with the  
367 outlier removed ( $b = 0.926$ ,  $P = 0.023$ ). Our whole-leaf estimates of shape (circularity and  
368 Haralick circularity) similarly both showed increased circularity northward, but their sensitivity  
369 to the latitudinal gradient is different. This may be a consequence to the relative insensitivity of  
370 Haralick circularity to leaf tooting (Haralick, 1974), which manifests in bur oak as differences  
371 in crenulation. We did not quantify this effect directly, but leave it to future studies.

372         The hypothesis that leaf lobing increases southward in response to increased water stress  
373 is supported by the specific leaf area (SLA) data. With leaf length as a covariate, SLA increases  
374 northward ( $b = 0.987$ ,  $P = 0.011$ ), even as leaf size decreases. Leaves that are low in SLA have  
375 higher water use efficiency (Mooney and Dunn, 1970; Marron et al., 2003; Liu et al., 2017) and  
376 have been shown to vary within oaks according to water stress (Ramírez-Valiente and Cavender-  
377 Bares, 2017; Ramírez-Valiente et al., 2017). This corresponds with our finding that bur oak  
378 leaves at southern sites, where trees are exposed to warmer temperatures and are likely more  
379 water-stressed, had significantly lower SLA than leaves collected at northern sites. However, leaf  
380 area in cross-species oak comparisons covaries with SLA (Ramírez-Valiente et al., 2020), and  
381 leaf area and SLA both decrease on average with increased water stress in cross-species  
382 comparisons (Kaproth and Cavender-Bares, 2016; Ramírez-Valiente et al., 2020). Our finding  
383 of larger leaf areas with lower SLA in bur oak, but with an increase in lobing, suggests that leaf  
384 lobing may compensate for increased size in areas with great water stress.

385         The immense success of oaks (*Quercus*) in the Americas (Rodríguez-Correa et al., 2015;  
386 Hipp et al., 2018; Cavender-Bares, 2019) has been attributed in part to oaks' ability to cross the  
387 temperate-tropical divide. Bur oak is exceptional in its climatic range, extending from near the

388 boreal zone in the north to the great plains and the humid subtropics. Our finding that leaf lobing,  
389 SLA, and leaf size compensate for one another along climatic gradients in bur oak may be  
390 echoed in other species. The work presented here consequently has the potential to inform  
391 studies of adaptive variation across oaks and temperate tree species more generally.

392

### 393 **ACKNOWLEDGMENTS**

394 This study was funded by The Morton Arboretum Center for Tree Science and USDA  
395 Project 8020-21000-070-03S, a non-assistance cooperative agreement between U.S. National  
396 Arboretum and The Morton Arboretum. We would like to thank Marlene Hahn for assisting with  
397 curation of herbarium and leaf samples and Matthew Kaproth for advice on measurement of  
398 SLA. Ricardo Kriebel provided particularly detailed advice on morphometric analysis, including  
399 code to assist in generating landmarks and excellent feedback on interpretation of our results;  
400 and Associate Editor Dylan Schwilk, with an anonymous reviewer and Kriebel, provided  
401 editorial feedback that substantially improved the manuscript.

402

### 403 **AUTHOR CONTRIBUTIONS**

404 A.L.H., A.T.W. and S.C.D. conceptualized and designed the project. S.C.D., M.G., and  
405 S.F. collected specimens and data. S.C.D. and A.L.H. conducted data analyses. S.C.D. wrote the  
406 first draft of the manuscript, and A.L.H. revised the manuscript in response to reviewers. A.L.H.  
407 coded and analyzed simulations and contributed to data analysis. All authors contributed to  
408 writing and revisions; A.L.H. and S.C.D. contributed equally to analysis and writing.

409

### 410 **DATA ACCESSIBILITY**

411 Data and scripts used to conduct the statistical analysis are archived in GitHub  
412 (<https://github.com/andrew-hipp/oak-morph-2020>) and released through Zenodo  
413 (<https://doi.org/10.5281/zenodo.4213821>). Supplemental figures are available in the GitHub  
414 repository and in the online Supplement.

415 **REFERENCES CITED**

- 416 Abrams, M. D. 1994. Genotypic and phenotypic variation as stress adaptations in temperate  
417 tree species: a review of several case studies. *Tree Physiology* 14: 833–842.
- 418 Abrams, M. D., and M. E. Kubiske. 1990. Leaf structural characteristics of 31 hardwood and  
419 conifer tree species in central Wisconsin: Influence of light regime and shade-tolerance  
420 rank. *Forest Ecology and Management* 31: 245–253.
- 421 Abrams, M. D., M. E. Kubiske, and S. A. Mostoller. 1994. Relating Wet and Dry Year  
422 Ecophysiology to Leaf Structure in Contrasting Temperate Tree Species. *Ecology* 75:  
423 123–133.
- 424 Aizen, M. A., and C. Ezcurra. 2008. Do leaf margins of the temperate forest flora of southern  
425 South America reflect a warmer past? *Global Ecology and Biogeography* 17: 164–174.
- 426 Apostol, E. N., A. L. Curtu, L. M. Daia, B. Apostol, C. G. Dinu, and N. Şofletea. 2017. Leaf  
427 morphological variability and intraspecific taxonomic units for pedunculate oak and  
428 grayish oak (genus *Quercus* L., series *Pedunculatae* Schwz.) in Southern Carpathian  
429 Region (Romania). *Science of The Total Environment* 609: 497–505.
- 430 Auguie, B. 2017. gridExtra: Miscellaneous Functions for ‘Grid’ Graphics.
- 431 Bailey, I. W., and E. W. Sinnott. 1915. A Botanical Index of Cretaceous and Tertiary Climates.  
432 *Science* 41: 831–834.
- 433 Bailey, I. W., and E. W. Sinnott. 1916. The Climatic Distribution of Certain Types of Angiosperm  
434 Leaves. *American Journal of Botany* 3: 24–39.
- 435 Baranski, M. J. 1975. An analysis of variation within white oak (*Quercus alba* L.). North Carolina  
436 Agricultural Experiment Station, Raleigh.
- 437 Becker, R. A., A. R. Wilks, R. Brownrigg, T. P. Minka, and A. Deckmyn. 2018. maps: Draw  
438 Geographical Maps.
- 439 Bivand, R. S., E. Pebesma, and V. Gomez-Rubio. 2013. Applied spatial data analysis with R,  
440 Second edition. Springer, NY.
- 441 Blue, M. P., and R. J. Jensen. 1988. Positional and seasonal variation in oak (*Quercus*,  
442 Fagaceae) leaf morphology. *American Journal of Botany* 75: 939–947.
- 443 Bonhomme, V., S. Picq, C. Gaucherel, and J. Claude. 2014. Momocs: Outline Analysis Using R.  
444 *Journal of Statistical Software* 56: 1–24.
- 445 Bragg, J. G., and M. Westoby. 2002. Leaf size and foraging for light in a sclerophyll woodland.  
446 *Functional Ecology* 16: 633–639.
- 447 Bruschi, P., P. Grossoni, and F. Bussotti. 2003. Within- and among-tree variation in leaf  
448 morphology of *Quercus petraea* (Matt.) Liebl. natural populations. *Trees* 17: 164–172.

- 449 Burnham, R. J., and G. S. Tonkovich. 2011. Climate, leaves, and the legacy of two giants. *New*  
450 *Phytologist* 190: 514–517.
- 451 Cavender-Bares, J. 2019. Diversification, adaptation, and community assembly of the American  
452 oaks (*Quercus*), a model clade for integrating ecology and evolution. *New Phytologist*  
453 221: 669–692.
- 454 Crampton, J. S. 1995. Elliptic Fourier shape analysis of fossil bivalves: some practical  
455 considerations. *Lethaia* 28: 179–186.
- 456 Ducrey, M. 1992. Variation in leaf morphology and branching pattern of some tropical rain forest  
457 species from Guadeloupe (French West Indies) under semi-controlled light conditions.  
458 *Annales des Sciences Forestières* 49: 553–570.
- 459 García-Nogales, A., J. C. Linares, R. G. Laureano, J. I. Seco, and J. Merino. 2016. Range-wide  
460 variation in life-history phenotypes: spatiotemporal plasticity across the latitudinal  
461 gradient of the evergreen oak *Quercus ilex*. *Journal of Biogeography* 43: 2366–2379.
- 462 Garner, M., K. K. Pham, A. T. Whitemore, J. Cavender-Bares, P. F. Gugger, P. S. Manos, I. S.  
463 Pearse, and A. L. Hipp. 2019. From Manitoba to Texas: A study of the population  
464 genetic structure of bur oak (*Quercus macrocarpa*). *International Oaks: The Journal of*  
465 *the International Oak Society* 30: 131–138.
- 466 Genz, A., and F. Bretz. 2009. Computation of Multivariate Normal and t Probabilities. Springer-  
467 Verlag, Heidelberg.
- 468 Genz, A., F. Bretz, T. Miwa, X. Mi, F. Leisch, F. Scheipl, and T. Hothorn. 2019. mvtnorm:  
469 Multivariate Normal and t Distributions.
- 470 Givnish, T. J. 1987. Comparative Studies of Leaf Form: Assessing the Relative Roles of  
471 Selective Pressures and Phylogenetic Constraints. *New Phytologist* 106: 131–160.
- 472 González-Rodríguez, A., D. M. Arias, S. Valencia-Avalos, and K. Oyama. 2004. Morphological  
473 and RAPD analysis of hybridization between *Quercus affinis* and *Q. laurina* (Fagaceae),  
474 two Mexican red oaks. *American Journal of Botany* 91: 401–409.
- 475 González-Rodríguez, A., and K. Oyama. 2005. Leaf morphometric variation in *Quercus affinis*  
476 and *Q. laurina* (Fagaceae), two hybridizing Mexican red oaks. *Botanical Journal of the*  
477 *Linnean Society* 147: 427–435.
- 478 Greenwood, D. R., P. Wilf, S. L. Wing, and D. C. Christophel. 2004. Paleotemperature  
479 Estimation Using Leaf-Margin Analysis: Is Australia Different? *PALAIOS* 19: 129–142.
- 480 Halloy, S. R. P., and A. F. Mark. 1996. Comparative leaf morphology spectra of plant  
481 communities in New Zealand, the Andes and the European Alps. *Journal of the Royal*  
482 *Society of New Zealand* 26: 41–78.
- 483 Hamerlynck, E. P., and A. K. Knapp. 1994. Leaf-level responses to light and temperature in two  
484 co-occurring *Quercus* (Fagaceae) species: implications for tree distribution patterns.  
485 *Forest Ecology and Management* 68: 149–159.

- 486 Haralick, R. M. 1974. A Measure for Circularity of Digital Figures. *IEEE Transactions on*  
487 *Systems, Man, and Cybernetics* SMC-4: 394–396.
- 488 Hijmans, R. 2017. raster: Geographic Data Analysis and Modeling. R package version 2.6-7.
- 489 Hipp, A. L., P. S. Manos, A. González-Rodríguez, M. Hahn, M. Kaproth, J. D. McVay, S. V.  
490 Avalos, and J. Cavender-Bares. 2018. Sympatric parallel diversification of major oak  
491 clades in the Americas and the origins of Mexican species diversity. *New Phytologist*  
492 217: 439–452.
- 493 Hipp, A. L., A. T. Whittemore, M. Garner, M. Hahn, E. Fitzek, E. Guichoux, J. Cavender-Bares,  
494 et al. 2019. Genomic identity of white oak species in an eastern North American  
495 syngameon. *Annals of the Missouri Botanical Garden* 104: 455–477.
- 496 Hoban, S. 2014. An overview of the utility of population simulation software in molecular  
497 ecology. *Molecular Ecology* 23: 2383–2401.
- 498 Hoban, S. 2019. New guidance for ex situ gene conservation: Sampling realistic population  
499 systems and accounting for collection attrition. *Biological Conservation* 235: 199–208.
- 500 Hoban, S., T. Callicrate, J. Clark, S. Deans, M. Dosmann, J. Fant, O. Gailing, et al. 2020.  
501 Taxonomic similarity does not predict necessary sample size for ex situ conservation: a  
502 comparison among five genera. *Proceedings of the Royal Society B: Biological Sciences*  
503 287: 20200102.
- 504 Hoban, S., O. Gaggiotti, and G. Bertorelle. 2013. Sample Planning Optimization Tool for  
505 conservation and population Genetics (SPOTG): a software for choosing the appropriate  
506 number of markers and samples. *Methods in Ecology and Evolution* 4: 299–303.
- 507 Howard, D., R. Preszler, J. Williams, S. Fenchel, and W. Boecklen. 1997. How discrete are oak  
508 species? Insights from a hybrid zone between *Quercus grisea* and *Quercus gambelii*.  
509 *Evolution* 51: 747–755.
- 510 Jensen, R. J. 1990. Detecting shape variation in oak leaf morphology: A comparison of  
511 rotational-fit methods. *American Journal of Botany* 77: 1279–1293.
- 512 Jensen, R. J., R. Depiero, and B. K. Smith. 1984. Vegetative characters, population variation,  
513 and the hybrid origin of *Quercus ellipsoidalis*. *American Midland Naturalist* 111: 364–  
514 370.
- 515 Kaproth, M. A., and J. Cavender-Bares. 2016. Drought tolerance and climatic distributions of the  
516 American oaks. *International Oak Journal* 27: 49–60.
- 517 Koenig, W. D., J. M. H. Knops, J. L. Dickinson, and B. Zuckerberg. 2009. Latitudinal decrease in  
518 acorn size in bur oak (*Quercus macrocarpa*) is due to environmental constraints, not  
519 avian dispersal. *Botany* 87: 349–356.
- 520 Kremer, A., J. Dupouey, J. Deans, J. Cottrell, U. Csaikl, R. Finkeldey, S. Espinel, et al. 2002.  
521 Leaf morphological differentiation between *Quercus robur* and *Quercus petraea* is stable  
522 across western European mixed oak stands. *Annals of Forest Science* 59: 777–787.

- 523 Li, Y., P. B. Reich, B. Schmid, N. Shrestha, X. Feng, T. Lyu, B. S. Maitner, et al. 2020. Leaf size  
524 of woody dicots predicts ecosystem primary productivity. *Ecology Letters* 23: 1003–  
525 1013.
- 526 Little, E. L. 1971. Atlas of United States trees, volume 1, Conifers and important hardwoods.  
527 U.S. Dept. of Agriculture, Forest Service, Washington, D.C.□:
- 528 Little, S. A., S. W. Kembel, and P. Wilf. 2010. Paleotemperature Proxies from Leaf Fossils  
529 Reinterpreted in Light of Evolutionary History. *PLOS ONE* 5: e15161.
- 530 Liu, M., Z. Wang, S. Li, X. Lü, X. Wang, and X. Han. 2017. Changes in specific leaf area of  
531 dominant plants in temperate grasslands along a 2500-km transect in northern China.  
532 *Scientific Reports* 7: 10780.
- 533 Marron, N., E. Dreyer, E. Boudouresque, D. Delay, J.-M. Petit, F. M. Delmotte, and F. Brignolas.  
534 2003. Impact of successive drought and re-watering cycles on growth and specific leaf  
535 area of two *Populus x canadensis* (Moench) clones, ‘Dorskamp’ and ‘Luisa\_Avanzo’. 23:  
536 11.
- 537 McCarthy, D. M., and R. J. Mason-Gamer. 2019. Morphological Variation in North American  
538 *Tilia* and Its Value in Species Delineation. *International Journal of Plant Sciences* 181:  
539 175–195.
- 540 McDonald, P. G., C. R. Fonseca, J. M. Overton, and M. Westoby. 2003. Leaf-size divergence  
541 along rainfall and soil-nutrient gradients: is the method of size reduction common among  
542 clades? *Functional Ecology* 17: 50–57.
- 543 McKee, M. L., D. L. Royer, and H. M. Poulos. 2019. Experimental evidence for species-  
544 dependent responses in leaf shape to temperature: Implications for paleoclimate  
545 inference. *PLOS ONE* 14: e0218884.
- 546 McKee, M., and D. L. Royer. 2017. How Does Temperature Impact Leaf Size and Shape in Four  
547 Woody Dicot Species? Testing the Assumptions of Leaf Physiognomy-Climate Models.  
548 *AGU Fall Meeting Abstracts* 11.
- 549 Minchin, P. R. 1987. An evaluation of the relative robustness of techniques for ecological  
550 ordination. *Vegetatio* 69: 89–107.
- 551 Moles, A. T., S. E. Perkins, S. W. Laffan, H. Flores-Moreno, M. Awasthy, M. L. Tindall, L. Sack,  
552 et al. 2014. Which is a better predictor of plant traits: temperature or precipitation?  
553 *Journal of Vegetation Science* 25: 1167–1180.
- 554 Mooney, H. A., and E. L. Dunn. 1970. Convergent Evolution of Mediterranean-Climate  
555 Evergreen Sclerophyll Shrubs. *Evolution* 24: 292–303.
- 556 Oksanen, J., F. G. Blanchet, M. Friendly, R. Kindt, P. Legendre, D. McGlenn, P. R. Minchin, et  
557 al. 2017. vegan: Community Ecology Package. R package version 2.4-5.
- 558 Pebesma, E. J., and R. S. Bivand. 2005. Classes and methods for spatial data in R. *R News* 5:  
559 9–13.



- 560 Peppe, D. J., D. L. Royer, B. Cariglino, S. Y. Oliver, S. Newman, E. Leight, G. Enikolopov, et al.  
561 2011. Sensitivity of leaf size and shape to climate: global patterns and paleoclimatic  
562 applications. *New Phytologist* 190: 724–739.
- 563 R Core Team. 2018. R: A language and environment for statistical computing, version 3.4.4. R  
564 Foundation for Statistical Computing, Vienna.
- 565 Ramírez-Valiente, J. A., and J. Cavender-Bares. 2017. Evolutionary trade-offs between drought  
566 resistance mechanisms across a precipitation gradient in a seasonally dry tropical oak  
567 (*Quercus oleoides*). *Tree Physiology*: 1–13.
- 568 Ramírez-Valiente, J. A., A. Center, J. Sparks, K. Sparks, J. Etterson, T. Longwell, G. Pilz, and J.  
569 Cavender-Bares. 2017. Population-level differentiation in growth rates and leaf traits in  
570 seedlings of the neotropical live oak *Quercus oleoides* grown under natural and  
571 manipulated precipitation regimes. *Frontiers in Plant Science* 8.
- 572 Ramírez-Valiente, J. A., R. López, A. L. Hipp, and I. Aranda. 2020. Correlated evolution of  
573 morphology, gas exchange, growth rates and hydraulics as a response to precipitation  
574 and temperature regimes in oaks (*Quercus*). *New Phytologist* 227: 794–809.
- 575 Rodríguez-Correa, H., K. Oyama, I. MacGregor-Fors, and A. González-Rodríguez. 2015. How  
576 are oaks distributed in the neotropics? A perspective from species turnover, areas of  
577 endemism, and climatic niches. *International Journal of Plant Sciences* 176: 222–231.
- 578 Rosin, P. L. 2005. Computing global shape measures. *Handbook of Pattern Recognition and*  
579 *Computer Vision*, 177–196. WORLD SCIENTIFIC.
- 580 Royer, D. L., J. C. McElwain, J. M. Adams, and P. Wilf. 2008. Sensitivity of leaf size and shape  
581 to climate within *Acer rubrum* and *Quercus kelloggii*. *New Phytologist* 179: 808–817.
- 582 Royer, D. L., and P. Wilf. 2006. Why Do Toothed Leaves Correlate with Cold Climates? Gas  
583 Exchange at Leaf Margins Provides New Insights into a Classic Paleotemperature  
584 Proxy. *International Journal of Plant Sciences* 167: 11–18.
- 585 Royer, D. L., P. Wilf, D. A. Janesko, E. A. Kowalski, and D. L. Dilcher. 2005. Correlations of  
586 climate and plant ecology to leaf size and shape: potential proxies for the fossil record.  
587 *American Journal of Botany* 92: 1141–1151.
- 588 Schmerler, S. B., W. L. Clement, J. M. Beaulieu, D. S. Chatelet, L. Sack, M. J. Donoghue, and  
589 E. J. Edwards. 2012. Evolution of leaf form correlates with tropical-temperate transitions  
590 in *Viburnum* (Adoxaceae). *Proceedings of the Royal Society B: Biological Sciences* 279:  
591 3905–3913.
- 592 Schnabel, A., and J. L. Hamrick. 1990. Comparative Analysis of Population Genetic Structure in  
593 *Quercus macrocarpa* and *Q. gambelii* (Fagaceae). *Systematic Botany* 15: 240–251.
- 594 Schneider, C. A., W. S. Rasband, and K. W. Eliceiri. 2012. NIH Image to ImageJ: 25 years of  
595 image analysis. *Nature Methods* 9: 671–675.
- 596 Sokal, R. R., T. J. Crovello, and R. S. Unnasch. 1986. Geographic Variation of Vegetative  
597 Characters of *Populus deltoides*. *Systematic Botany* 11: 419–432.



- 598 Stein, J., D. Binion, and R. Acciavatti. 2003. Field Guide to Native Oak Species of Eastern North  
599 America (FHTET-2003-01). United States Department of Agriculture Forest Service,  
600 Forest Health Technology Enterprise Team, Morgantown.
- 601 Tracey, S. R., J. M. Lyle, and G. Duhamel. 2006. Application of elliptical Fourier analysis of  
602 otolith form as a tool for stock identification. *Fisheries Research* 77: 138–147.
- 603 Walls, R. L. 2011. Angiosperm leaf vein patterns are linked to leaf functions in a global-scale  
604 data set. *American Journal of Botany* 98: 244–253.
- 605 Wickham, H. 2009. ggplot2: Elegant Graphics for Data Analysis. Springer-Verlag, New York.
- 606 Wright, I. J., N. Dong, V. Maire, I. C. Prentice, M. Westoby, S. Díaz, R. V. Gallagher, et al. 2017.  
607 Global climatic drivers of leaf size. *Science* 357: 917–921.
- 608 Wright, I. J., P. B. Reich, M. Westoby, D. D. Ackerly, Z. Baruch, F. Bongers, J. Cavender-Bares,  
609 et al. 2004. The worldwide leaf economics spectrum. *Nature* 428: 821–827.
- 610

611 **Table 1. Sampling localities, Bioclim values for each site, number of leaves collected per**  
 612 **tree.** Only leaves used for statistical analysis are counted. Broken or incomplete leaves were  
 613 eliminated from statistical analysis. Abbreviations: Bio1 = mean annual temperature (in degrees  
 614 C); Bio12 = mean annual precipitation (in mm).

| <u>Site</u>                    | <u>Bio1, Bio12</u> | <u>Tree</u> | <u>Latitude</u> | <u>Longitude</u> | <u>Lvs</u> |
|--------------------------------|--------------------|-------------|-----------------|------------------|------------|
| Whiteshell Provincial Park     | 2.07°C, 566 mm     | MB-SD004    | 49.4249         | -95.1436         | 8          |
|                                |                    | MB-SD005    | 49.71279        | -95.2444         | 8          |
|                                |                    | MB-MG513    | 49.71209        | -95.24496        | 8          |
| Spruce Woods Provincial Park   | 2.50°C, 460 mm     | MB-MG516    | 49.76104        | -99.15971        | 8          |
|                                |                    | MB-MG517    | 49.76095        | -99.15983        | 8          |
|                                |                    | MB-MG518    | 49.76061        | -99.15928        | 8          |
| Assiniboine Forest             | 2.10°C, 519 mm     | MB-MG528    | 49.85778        | -97.24848        | 8          |
|                                |                    | MB-MG529    | 49.85423        | -97.2482         | 8          |
|                                |                    | MB-MG530    | 49.85392        | -97.24828        | 8          |
| University of Minnesota Campus | 7.10°C, 738 mm     | MN-MG788    | 44.97882        | -93.23768        | 8          |
|                                |                    | MN-MG789    | 44.97739        | -93.23761        | 8          |
|                                |                    | MN-MG790    | 44.97771        | -93.23801        | 7          |
| Cherokee Park Trail            | 9.20°C, 879 mm     | IA-MG243    | 41.97454        | -91.72161        | 8          |
|                                |                    | IA-MG244    | 41.97367        | -91.72547        | 8          |
|                                |                    | IA-MG245    | 41.97362        | -91.72565        | 6          |
| Morton Arboretum               | 9.50°C, 932 mm     | IL-SF001    | 41.81696        | -88.0808         | 8          |
|                                |                    | IL-SF002    | 41.81331        | -88.08266        | 8          |
|                                |                    | IL-SF003    | 41.81588        | -88.07994        | 8          |
| Prairie Moon Nursery           | 6.80°C, 837 mm     | MN-SD001    | 43.89117        | -91.64684        | 8          |
|                                |                    | MN-SD002    | 43.89804        | -91.648          | 8          |
|                                |                    | MN-SD003    | 43.89088        | -91.64689        | 2          |
| Burr Oak Woods                 | 9.80°C, 943 mm     | IN-MG631    | 41.53273        | -87.2948         | 8          |
|                                |                    | IN-MG636    | 41.5345         | -87.29279        | 8          |
|                                |                    | IN-MG638    | 41.53253        | -87.29661        | 8          |
| Red Rock Canyon State Park     | 15.3°C, 756 mm     | OK-MG369    | 35.43874        | -98.35495        | 8          |
|                                |                    | OK-MG370    | 35.43851        | -98.35503        | 8          |
|                                |                    | OK-MG371    | 35.43854        | -98.35497        | 8          |
| Mohawk Park                    | 15.3°C, 987        | OK-MG347    | 36.21066        | -95.89467        | 8          |

|                            |                 |          |          |           |   |
|----------------------------|-----------------|----------|----------|-----------|---|
|                            | mm              | OK-MG349 | 36.2204  | -95.89845 | 8 |
|                            |                 | OK-MG350 | 36.22064 | -95.89877 | 8 |
| Tallgrass Prairie Preserve | 14.3°C, 939 mm  | OK-MG282 | 36.84504 | -96.42526 | 8 |
|                            |                 | OK-MG283 | 36.84485 | -96.42479 | 2 |
|                            |                 | OK-MG284 | 36.84501 | -96.42553 | 3 |
| Buttin Rock Access         | 13.1°C, 1121 mm | MO-MG402 | 37.15687 | -91.36471 | 8 |
|                            |                 | MO-MG403 | 37.15686 | -91.36501 | 8 |
|                            |                 | MO-MG404 | 37.15726 | -91.36518 | 8 |

615

616 **Table 2. Descriptions of the leaf traits measured**

---

| <u>Leaf measurements</u>                                        |                     |                                                                                                                                                                                                                                                                               |
|-----------------------------------------------------------------|---------------------|-------------------------------------------------------------------------------------------------------------------------------------------------------------------------------------------------------------------------------------------------------------------------------|
| Trait                                                           | Abbreviation        | Definition                                                                                                                                                                                                                                                                    |
| Blade length (mm)                                               | bladeL              | Straight line distance measured from intersection of leaf and petiole to tip of the leaf at its point of intersection with the midvein                                                                                                                                        |
| Blade width (mm)                                                | bladeW              | The longest possible perpendicular line drawn from one edge of the blade to the other; vein position used to identify the leaves opposite one another                                                                                                                         |
| Width of blade between deepest pair of sinuses (mm)             | sinusMinL           | The shortest distance that separates the deepest sinus from its corresponding sinus. (The deepest sinus is defined as the sinus that has the longest distance from the most interior point of the sinus to the line that connects the two most exterior points of that sinus) |
| Width of blade between sinuses just above the deepest pair (mm) | sinusNextL          | The width between the sinuses that are immediately distal to the deepest sinuses (as defined in sinusMinL)                                                                                                                                                                    |
| Petiole length (mm)                                             | petioleL            | Measured from the base of the blade as defined by bladeL to the base of the petiole, defined as the line of intersection between petiole and branch, upper surface of the petiole                                                                                             |
| Petiole width (mm)                                              | petioleW            | Measured at the point of intersection between the blade and the petiole, where blade is not visible                                                                                                                                                                           |
| Length of lamina from base to widest point (mm)                 | bladeLtoWidestPoint | Measured from the base of the blade to the point of intersection between the midvein and the line used to measure leaf blade width                                                                                                                                            |
| Blade base angle (degrees)                                      | bladeBaseAngle      | Measured using the lines that define the widest angle between the base and either edge of the leaf                                                                                                                                                                            |
| Total length (mm)                                               | BL.PL               | Total length is the blade length added to the petiole length                                                                                                                                                                                                                  |
| Leaf area (mm <sup>2</sup> )                                    | Area                | Calculated in imageJ.                                                                                                                                                                                                                                                         |

---

---

**Ratios**

|                                             |                  |                                                                                                                                                      |
|---------------------------------------------|------------------|------------------------------------------------------------------------------------------------------------------------------------------------------|
| Petiole length / Total length               | PL.TL            | The petiole length divided by the total length                                                                                                       |
| Sinus ratio                                 | SinusRatio       | The width of the blade between the deepest pair of sinuses divided by the width of the blade between the pair of sinuses just above the deepest pair |
| Blade length/ Blade width                   | BL.BW            | The blade length divided by the blade width                                                                                                          |
| Petiole length / Petiole width              | PL.PW            | The petiole length divided by the petiole width                                                                                                      |
| Blade length / Blade length to widest point | BL.BLWP          | The blade length divided by the length of the blade from the base to the widest point                                                                |
| Ratio of Leaf size to petiole length        | BL.BW.over.PL.PW | The blade length divided by the blade width divided by the petiole length divided by the petiole width                                               |
| Specific leaf area                          | SLA              | Leaf area divided by the mass of the leaf                                                                                                            |
| Lobedness                                   | sinus.v.width    | The width of the blade between the deepest pair of sinuses divided by the blade width                                                                |

---

617

618

619

620 **Table 3. Simple and multiple regressions for all leaf traits.** The columns for Blade length and  
 621 Latitude represent the regression coefficient and p-value for a multiple regression with each leaf  
 622 trait regressed against Blade length and Latitude. Note that after Bonferroni correction for  
 623 multiple tests, only the regression of blade length on latitude + petiole width is significant; and  
 624 for that multiple regression, only the coefficient for latitude is significant

| Leaf trait                      | p-value   | $r^2$         | Blade length      | Latitude          | $R^2$ |
|---------------------------------|-----------|---------------|-------------------|-------------------|-------|
| bladeL                          | 0.012     | 0.486         |                   | -0.697, p = 0.012 | 0.486 |
| bladeW                          | 0.014     | 0.469         | 0.926, p < .001   | -0.039, p = 0.780 | 0.911 |
| sinusMinL                       | 0.208     | 0.153         | -0.069, p = 0.874 | 0.343, p = 0.443  | 0.156 |
| sinusNextL                      | 0.492     | 0.048         | 0.966, p = 0.014  | 0.893, p = 0.021  | 0.528 |
| petioleL                        | 0.262     | 0.124         | 0.812, p = 0.041  | 0.214, p = 0.546  | 0.463 |
| petioleW                        | p < 0.001 | 0.692         | 0.119, p = 0.649  | -0.749, p = 0.017 | 0.699 |
| bladeLtoWidestPoint             | 0.011     | 0.494         | 0.920, p < .001   | -0.062, p = 0.630 | 0.929 |
| bladeBaseAngle                  | 0.151     | 0.195         | -0.363, p = 0.386 | -0.695, p = 0.116 | 0.263 |
| TotalL.PL.BL                    | 0.019     | 0.438         | 1.03, p < 0.001   | 0.052, p = 0.459  | 0.979 |
| Area                            | 0.014     | 0.469         | 0.949, p < 0.001  | -0.024, p = 0.847 | 0.933 |
| SLA                             | 0.015     | 0.466         | 0.438, p = 0.188  | 0.987, p = 0.011  | 0.564 |
| PL.TL                           | 0.945     | $r^2 < 0.001$ | 0.347, p = 0.461  | 0.264, p = 0.572  | 0.062 |
| SinusRatio                      | 0.425     | 0.065         | -0.253, p = 0.580 | 0.078, p = 0.864  | 0.098 |
| BL.BW                           | 0.313     | 0.101         | -0.367, p = 0.408 | 0.062, p = 0.886  | 0.171 |
| BL.BLWP                         | 0.834     | 0.005         | 0.183, p = 0.699  | 0.196, p = 0.680  | 0.022 |
| sinus.v.width                   | 0.024     | 0.415         | -0.551, p = 0.103 | 0.259, p = 0.415  | 0.571 |
| sinus.v.width (no spruce woods) | 0.054     | 0.352         | -0.296, p = 0.152 | 0.163, p = 0.391  | 0.507 |

625

626

627 **Table 4. ANOVA for bladeL, SLA, PC1, PC2**

| Response |           | Df  | Sum of Squares | Mean Square | F-value | Pr(>F)    |
|----------|-----------|-----|----------------|-------------|---------|-----------|
| bladeL   | site      | 11  | 177345         | 16122.3     | 38.9996 | < 2.2e-16 |
|          | tree      | 24  | 83159          | 3465.0      | 8.3817  | < 2.2e-16 |
|          | residuals | 236 | 97562          | 413.4       |         |           |
| SLA      | site      | 11  | 1017054857     | 92459532    | 30.3766 | < 2.2e-16 |
|          | tree      | 24  | 703085034      | 29295210    | 9.6246  | < 2.2e-16 |
|          | residuals | 236 | 718331913      | 3043779     |         |           |
| PC1      | site      | 11  | 984.70         | 89.519      | 41.7620 | <2.2e-16  |
|          | tree      | 24  | 300.10         | 12.504      | 5.8335  | 8.101e-14 |
|          | residuals | 236 | 505.88         | 2.144       |         |           |
| PC2      | site      | 11  | 400.34         | 36.394      | 34.042  | <2.2e-16  |
|          | tree      | 24  | 318.70         | 13.279      | 12.421  | <2.2e-16  |
|          | residuals | 236 | 252.30         | 1.069       |         |           |

628

629

630

## 631 **FIGURE LEGENDS**

632

633 Figure 1. Locations of sampling sites for this study as well as mean annual temperature across  
634 the bur oak range. WorldClim temperature data are scaled to a factor of 10. Specific information  
635 about site, name, location, and number of samples collected can be found in Table 1.

636

637 Figure 2. Leaf trait measurements used in this study. All measurements used in this study were  
638 linear measurements or ratios of linear measurements, plus one angle. Details and definitions are  
639 found in Table 4.

640

641 Figure 3. Simple regressions of traits and environment that are significant at the 0.05 level. P-  
642 values are not corrected for multiple tests; a total of seventeen regressions were performed  
643 (Table 3).

644

645 Figure 4. Simple regressions of circularity on latitude.

646

647 Figure 5. Regressions of bioclim variables on latitude. Latitude shows up as the strongest single  
648 predictor of leaf morphology in the current study, as it integrates over both day length and  
649 several aspects of climate: bio 1 (mean annual temperature), bio 12 (mean annual precipitation),  
650 bio 4 (mean temperature seasonality).

651



652 Figure 6. Sampling simulations. Simulated sampling strategies accounted for covariance among  
653 traits within leaves; among leaves on trees within sites; and among trees within sites. Here, two  
654 estimates of power are reported: the number of groups of sites recognized as distinct from each  
655 other using Tukey's HSD at  $\alpha = 0.05$ ; and the probability of recognizing at least 50% of sites as  
656 distinct from each other. colors scale from darker as a higher number of groups are recognized,  
657 lighter as fewer are. Simulated numbers of sites distinguished (left panel) and probabilities of  
658 distinguishing at least 50% of simulated sites (right panel) are reported in each cell of the  
659 simulation.

660

661 Supplemental Figure S1. Biplots of all simple regressions performed, whether significant or not

662 Supplemental Figure S2. PCA based on eFourier analysis of leaf outlines.

663 Supplemental Figure S3. Non-metric multidimensional scaling ordination of PCA on leaf

664 measurements

Latitude (degrees)

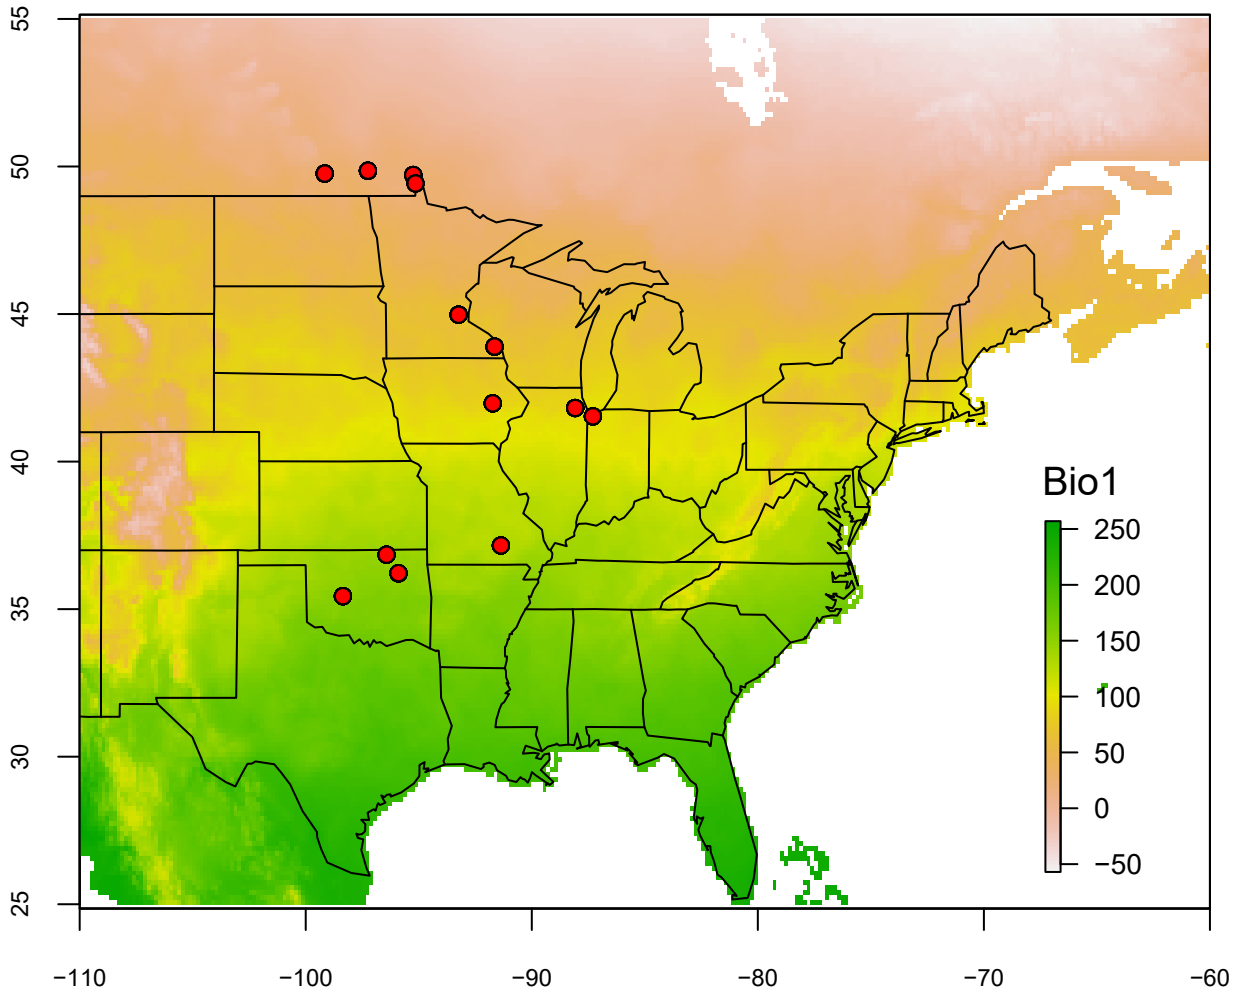

Bio1

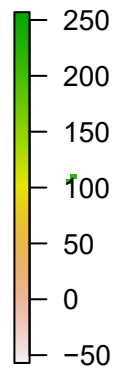

Longitude (degrees)

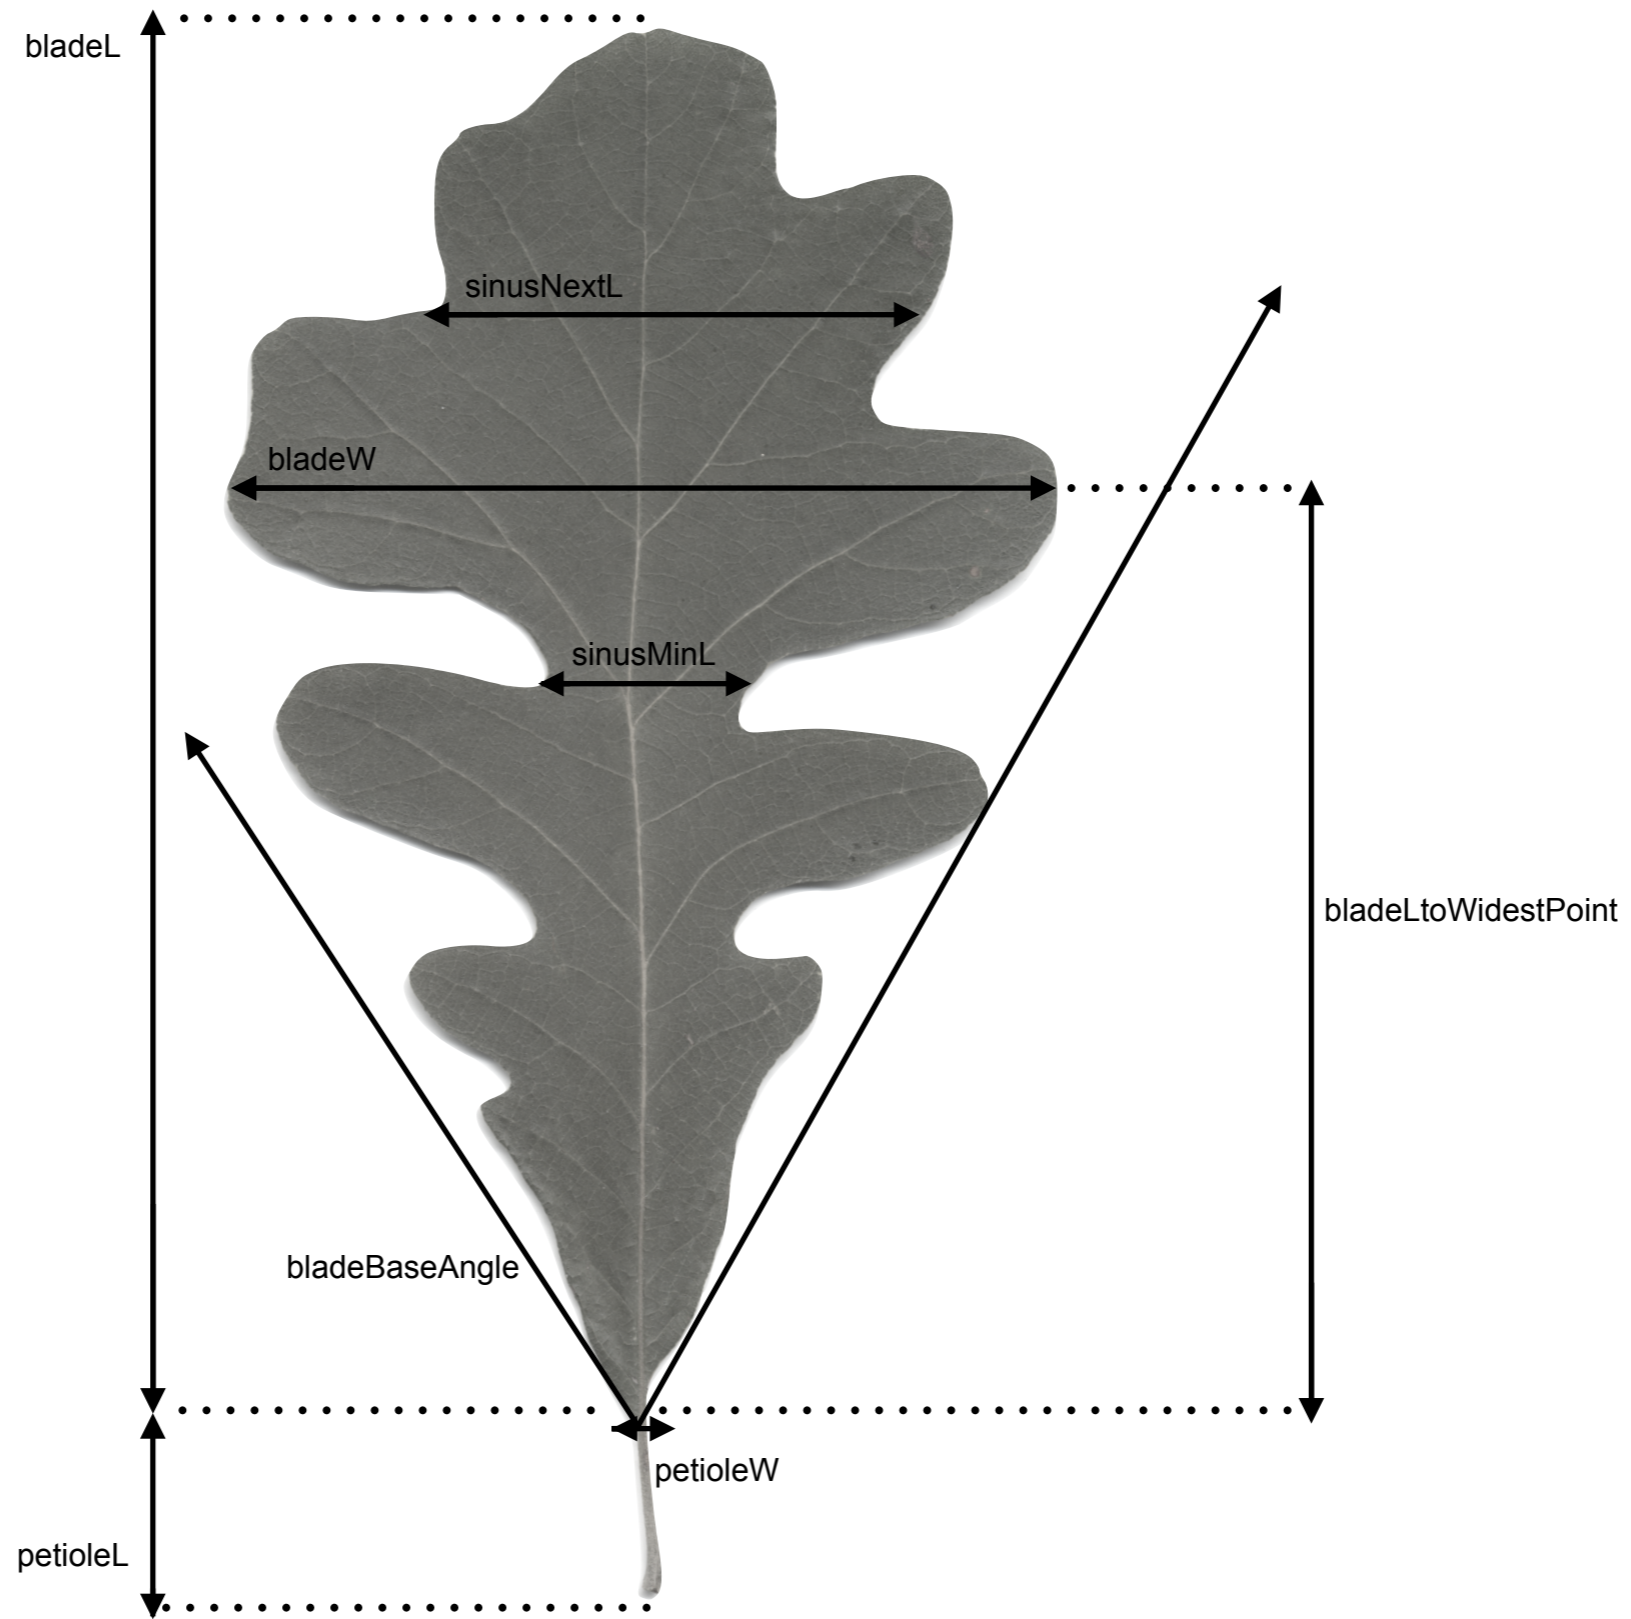

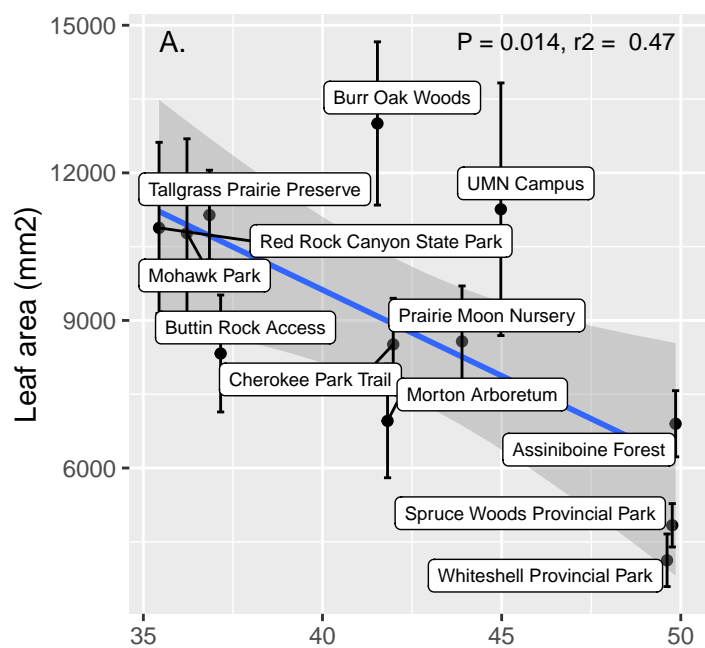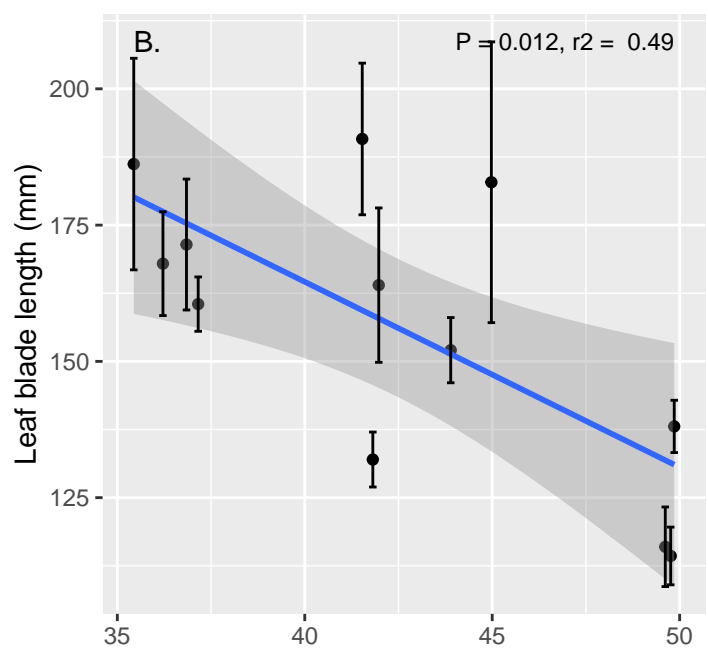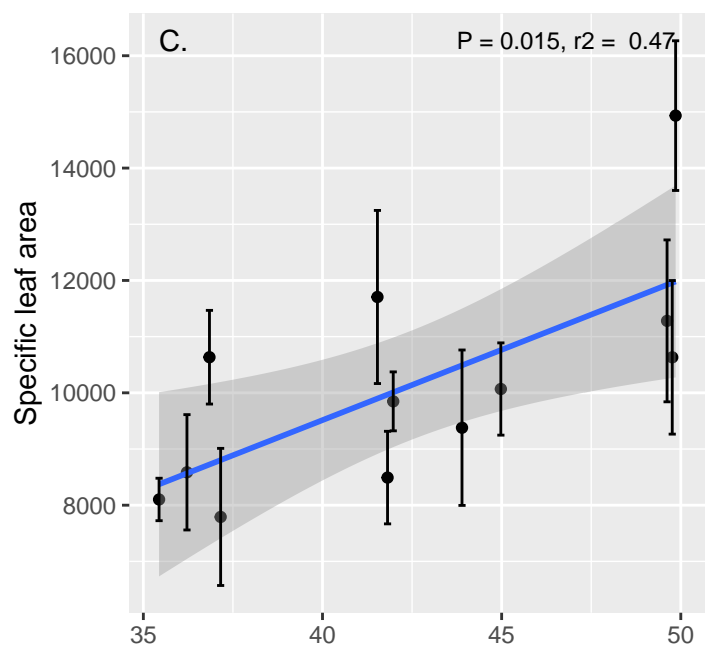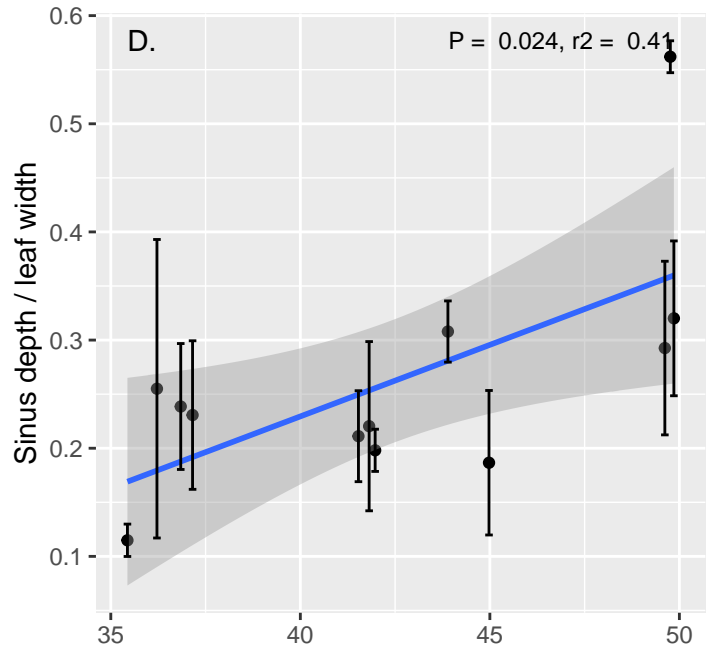

Latitude (degrees, all plots)

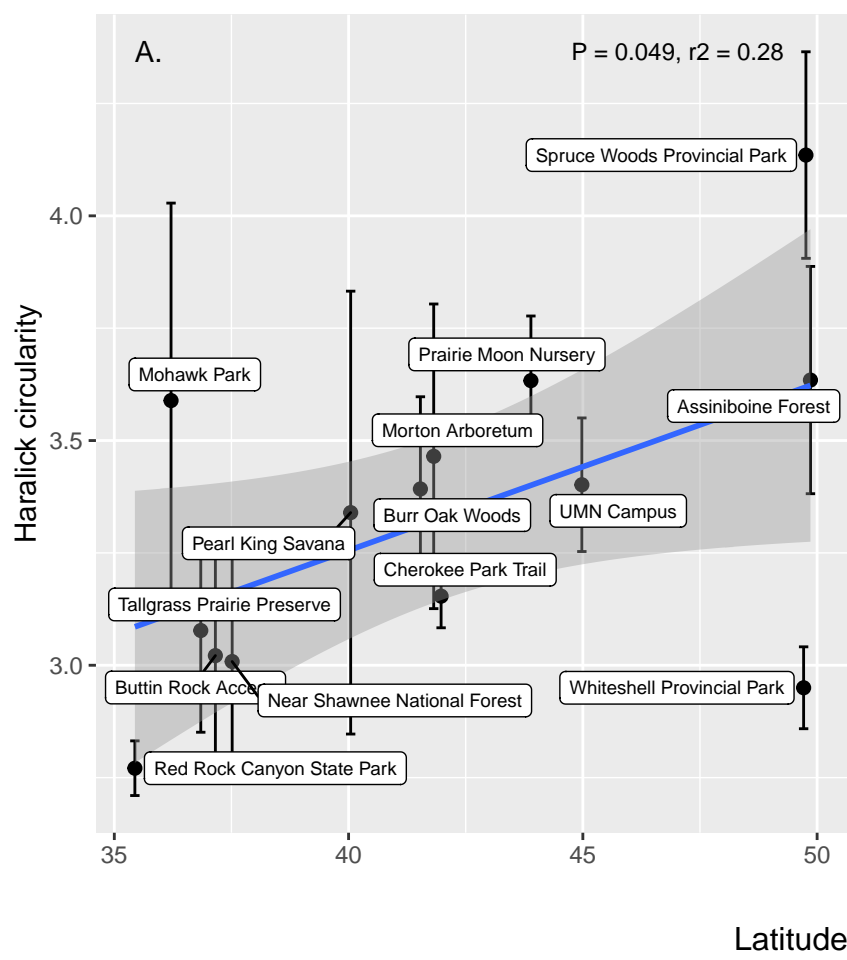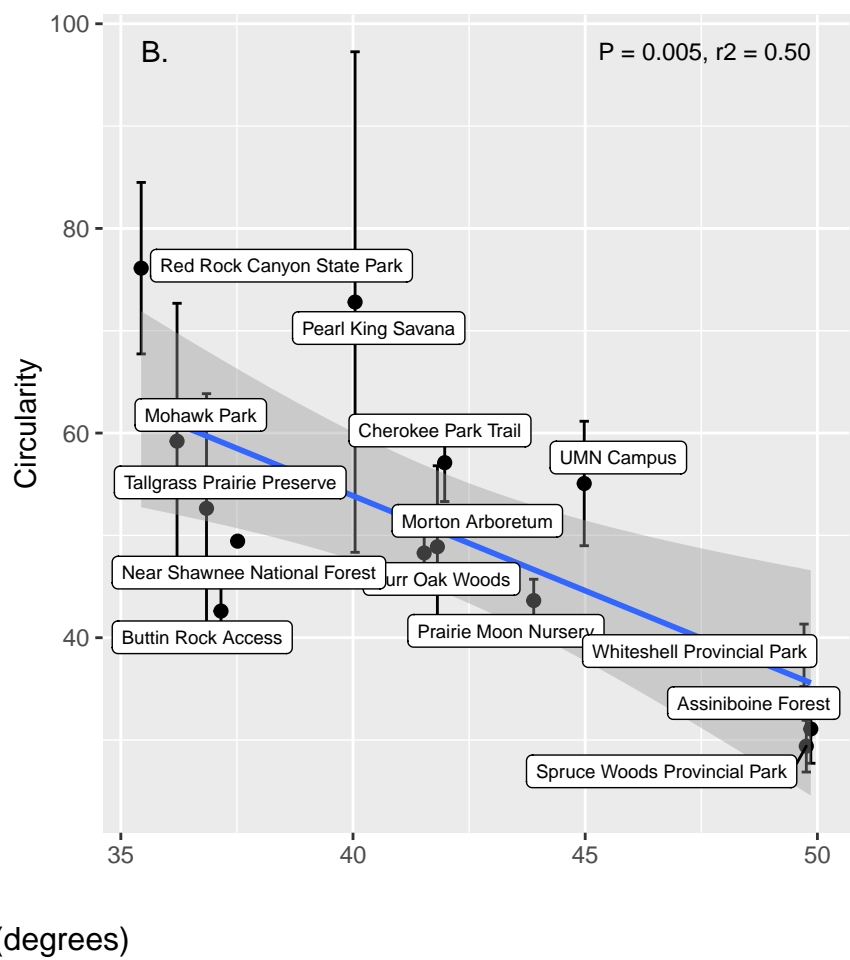

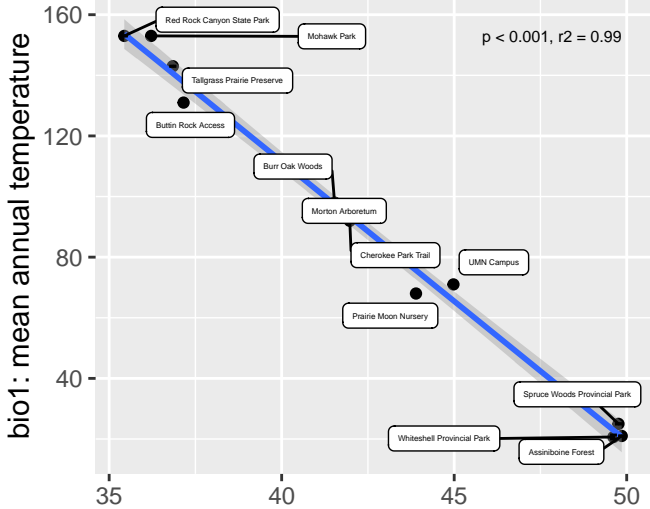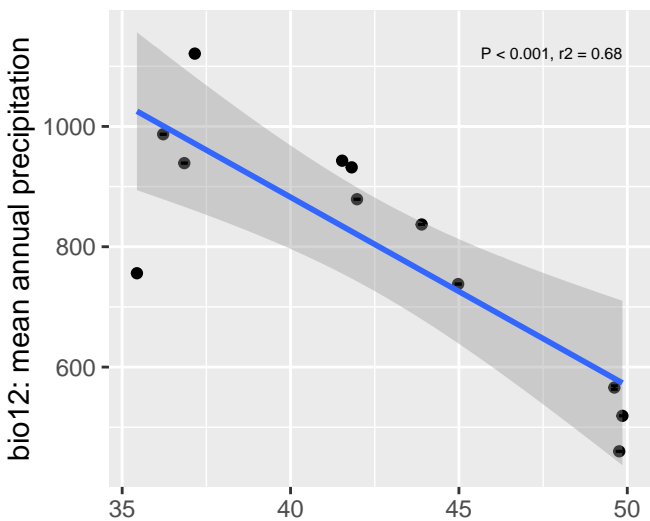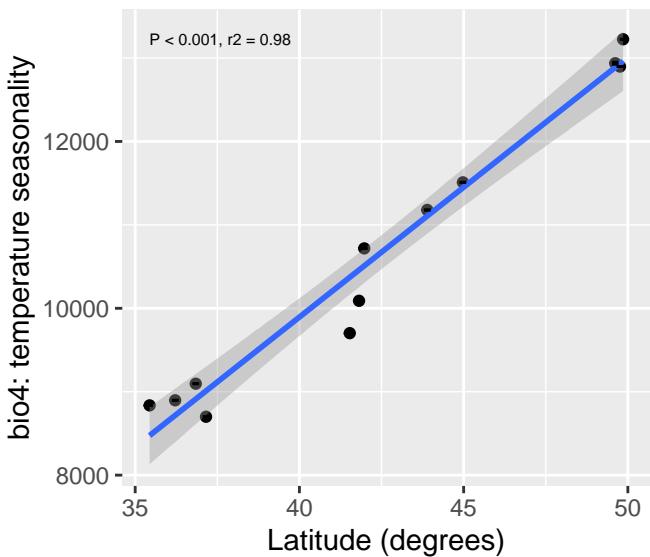

Mean groups recognized out of 20 populations

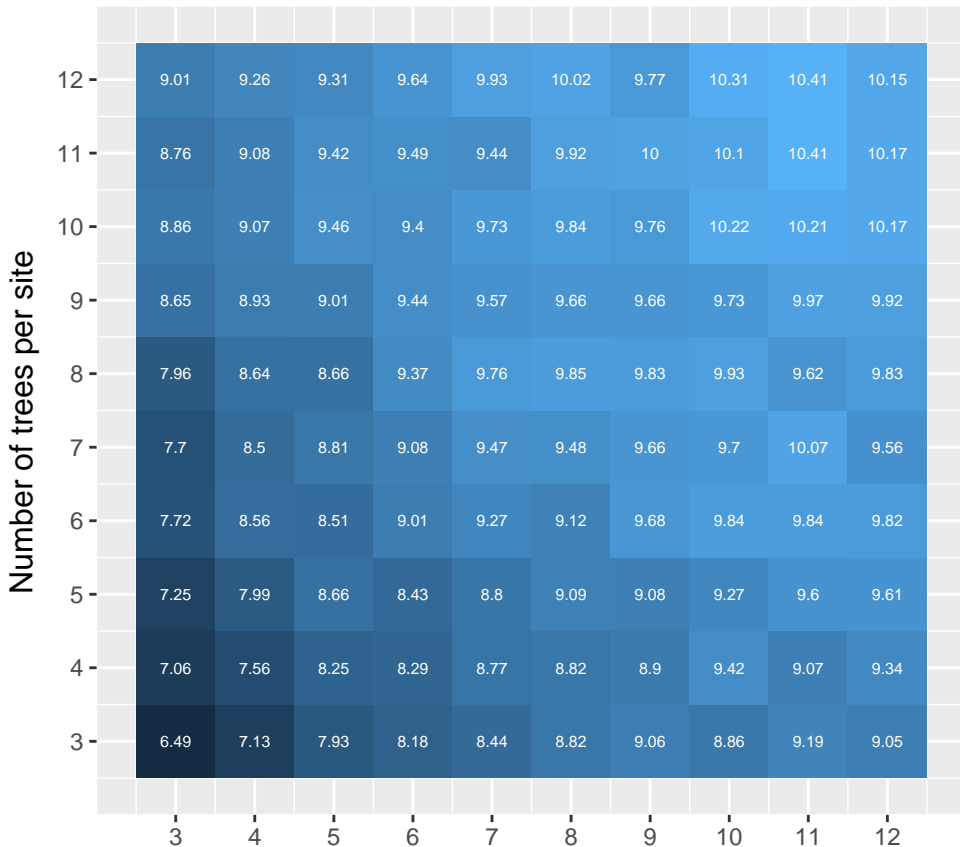

Probability of recognizing 50 percent of populations

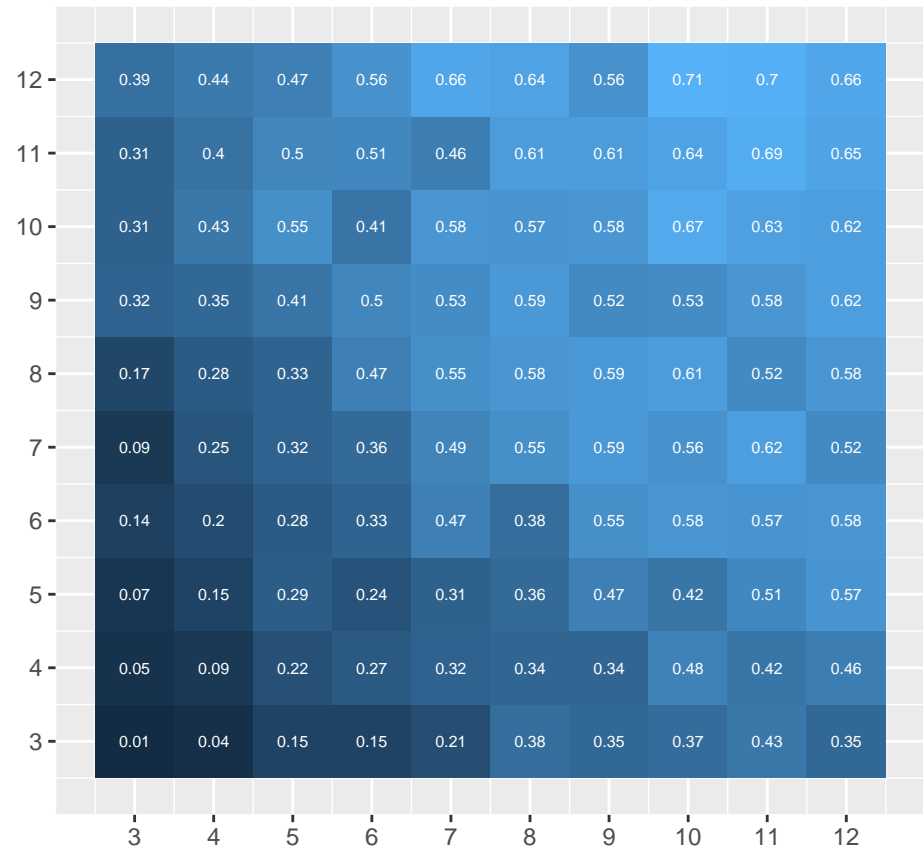

Number of leaves per tree
